1 **Discovery of a novel small protein factor involved in the coordinated**  
2 **degradation of phycobilisomes in cyanobacteria**

3

4 Vanessa Krauspe<sup>1</sup>, Matthias Fahrner<sup>2,4,5</sup>, Philipp Spät<sup>3</sup>, Claudia Steglich<sup>1</sup>, Nicole  
5 Frankenberg-Dinkel<sup>6</sup>, Boris Macek<sup>3</sup>, Oliver Schilling<sup>2</sup>, Wolfgang R. Hess<sup>1,\*</sup>

6

7 <sup>1</sup>Genetics and Experimental Bioinformatics, Faculty of Biology, Freiburg University,  
8 Germany;

9 <sup>2</sup>Institute for Surgical Pathology, Medical Center – University of Freiburg, Faculty of  
10 Medicine, University of Freiburg, Germany

11 <sup>3</sup>Department of Quantitative Proteomics, Interfaculty Institute for Cell Biology,  
12 University of Tübingen, Auf der Morgenstelle 15, 72076 Tübingen, Germany;

13 <sup>4</sup>Faculty of Biology, Albert-Ludwigs-University Freiburg, Freiburg, Germany

14 <sup>5</sup>Spemann Graduate School of Biology and Medicine (SGBM), Albert-Ludwigs-  
15 University Freiburg, Freiburg, Germany

16 <sup>6</sup>Microbiology, Faculty of Biology, University of Kaiserslautern, Kaiserslautern,  
17 Germany

18

19 \*corresponding author: Wolfgang R. Hess: [wolfgang.hess@biologie.uni-freiburg.de](mailto:wolfgang.hess@biologie.uni-freiburg.de)

20

21

22

23

24

25 **Keywords:** cyanobacteria, nitrogen starvation, gene expression, photosynthesis,  
26 phycobilisomes, *Synechocystis* sp. PCC 6803, small proteins, stress response

27

28

29

## 30 **Abstract**

31 Phycobilisomes are the major pigment-protein antenna complexes that perform  
32 photosynthetic light harvesting in cyanobacteria, rhodophyte and glaucophyte algae.  
33 Up to 50% of the cellular nitrogen can be stored in their giant structures. Accordingly,  
34 upon nitrogen depletion, phycobilisomes are rapidly degraded. This degradation is  
35 tightly coordinated, follows a genetic program and involves small proteins serving as  
36 proteolysis adaptors. Here, we describe the role of NblD, a novel factor in this process  
37 in cyanobacteria. NblD is a cysteine-rich, 66-amino acid small protein that becomes  
38 rapidly induced upon nitrogen starvation. Deletion of the *nblD* gene in the  
39 cyanobacterium *Synechocystis* prevents the degradation of phycobilisomes, leading to  
40 a nonbleaching (*nbl*) phenotype. Competition experiments provided direct evidence for  
41 the physiological importance of NblD. Complementation by a plasmid-localized gene  
42 copy fully restored the phenotype of the wild type. Overexpression of NblD under  
43 nitrogen-replete conditions showed no effect, in contrast to the unrelated proteolysis  
44 adaptors NblA1 and NblA2, which can trigger phycobilisome degradation ectopically.  
45 Transcriptome analysis revealed that nitrogen starvation correctly induces *nblA1/2*  
46 transcription in the  $\Delta nblD$  strain implying that NblD does not act as a transcriptional  
47 (co-)regulator. However, fractionation and coimmunoprecipitation experiments  
48 indicated the presence of NblD in the phycobilisome fraction and identified the  $\beta$ -  
49 phycocyanin subunit as its target. These data add NblD as a new factor to the  
50 genetically programmed response to nitrogen starvation and demonstrate that it plays  
51 a crucial role in the coordinated dismantling of phycobilisomes when nitrogen becomes  
52 limiting.

## 53 **Significance Statement**

54 During genome analysis, genes encoding small proteins are frequently neglected.  
55 Accordingly, small proteins have remained underinvestigated in all domains of life.  
56 Based on a previous systematic search for such genes, we present the functional  
57 analysis of the small protein NblD in a photosynthetic cyanobacterium. We show that  
58 NblD plays a crucial role during the coordinated dismantling of phycobilisome light-  
59 harvesting complexes. This disassembly is triggered when the cells run low in nitrogen,  
60 a condition that frequently occurs in nature. Similar to the NblA proteins that label  
61 phycobiliproteins for proteolysis, NblD binds to phycocyanin polypeptides but has a

62 different function. The results show that, even in a well-investigated process, crucial  
63 new players can be discovered if small proteins are taken into consideration.

## 64 **Introduction**

### 65 **The response of cyanobacteria to nitrogen starvation is governed by a complex** 66 **genetic program**

67 Nitrogen is an essential element of all organisms and frequently the main nutrient  
68 limiting life of photoautotrophic primary producers in many terrestrial, freshwater and  
69 marine ecosystems (1, 2). Cyanobacteria are the only prokaryotic primary producers  
70 performing oxygenic photosynthesis. Some cyanobacteria are of overwhelming  
71 relevance for the global biogeochemical cycles of carbon and nitrogen, exemplified by  
72 the marine *Prochlorococcus* and *Synechococcus* with their estimated global mean  
73 annual abundances of  $2.9 \pm 0.1 \times 10^{27}$  and  $7.0 \pm 0.3 \times 10^{26}$  cells (3–5). Other  
74 cyanobacteria came into focus for the ease of their genetic manipulation, fast growth  
75 and as platforms for the CO<sub>2</sub>-neutral production of diverse valuable products (e.g., (6,  
76 7)). With regard to their response to nitrogen starvation, cyanobacteria can be divided  
77 into two major physiological groups. Diazotrophic genera such as *Trichodesmium*,  
78 *Nodularia*, *Cyanothece*, *Nostoc* or *Anabaena* avoid nitrogen limitation by expressing  
79 nitrogenase to fix the omnipresent gaseous N<sub>2</sub>. In contrast, non-diazotrophic  
80 cyanobacteria such as *Synechococcus* and *Synechocystis* stop growth and switch  
81 their metabolism from anabolism to maintenance, a process that is controlled by a  
82 complex genetic program (8–10). An acute scarcity in the available nitrogen is sensed  
83 directly by two central regulators of nitrogen assimilation in cyanobacteria, P<sub>II</sub> and  
84 NtcA, by binding the key metabolite 2-oxoglutarate (2-OG) (11–15). 2-OG is the  
85 substrate for amination by glutamine oxoglutarate aminotransferase (GOGAT), which  
86 catalyzes the transfer of the amino group from glutamine to 2-OG, yielding two  
87 molecules of glutamate. This glutamate then is the substrate for amination by  
88 glutamine synthetase, the central enzyme of nitrogen assimilation in cyanobacteria. As  
89 a consequence, the intracellular level of 2-OG starts to increase once these reactions  
90 slow down because nitrogen is becoming scarce, making 2-OG an excellent indicator  
91 of nitrogen status (16). Upon binding 2-OG, the activity of NtcA, the main transcriptional  
92 regulator of nitrogen assimilation, becomes stimulated (11, 12). Depending on the 2-  
93 OG level, PipX switches from binding to P<sub>II</sub> to interacting with NtcA enhancing the  
94 binding affinity of this complex to target promoters further (13, 15). In the model  
95 cyanobacterium *Synechocystis* sp. PCC 6803 (from here on *Synechocystis* 6803),  
96 NtcA directly activates 51 genes and represses 28 other genes after 4 h of nitrogen

97 starvation (17). Among the NtcA-activated genes are the cotranscribed genes *nblA1*  
98 and *nblA2* (*ssl0452* and *ssl0453*) (17). Once they are expressed, NblA proteins impact  
99 the physiology dramatically. They initiate the degradation of phycobiliproteins, the  
100 major light harvesting pigments in the cyanobacterial phycobilisomes, a process that  
101 is visible by the naked eye because it leads to a color change from blue-green to  
102 yellowish.

103

#### 104 **Phycobilisomes, the most efficient structures for photosynthetic light** 105 **harvesting, become degraded during nitrogen starvation**

106 Phycobilisomes are the major light-harvesting system in red algae and most  
107 cyanobacteria. Phycobilisomes are giant protein-pigment complexes anchored to the  
108 thylakoid membranes (18, 19) that absorb light mainly in the “green gap” between 580  
109 and 650 nm. Phycobilisome complexes are highly abundant and may contain up to  
110 50% of the soluble cellular protein and nitrogen content (20). Therefore, their ordered  
111 disassembly is part of the physiological response to nitrogen starvation (10, 21–24)  
112 that can free a substantial amount of amino acids and release the nitrogen bound as  
113 part of the photosynthetic pigment molecules.

114 The degradation of phycobiliproteins is initiated by NblA proteins. Mutations in  
115 the *nblA* (*nonbleaching A*) genes yield, unlike the wild-type strain, a nonbleaching  
116 phenotype under nitrogen starvation because they do not degrade their  
117 phycobilisomes (25–27). Binding experiments indicated that NblA likely interacts with  
118 the  $\alpha$ -subunits of phycobiliproteins in *Tolypothrix* PCC 7601 (28) and *Anabaena* sp.  
119 PCC 7120 (29); however, in *Synechococcus elongatus* UTEX 2973, it was found to  
120 bind to the N-terminus of  $\beta$ -phycocyanin (30). Pull-down experiments then led to the  
121 discovery that NblA acts as an adaptor protein for the Clp protease by also interacting  
122 with the ClpC chaperone (31). Because the chaperone partner determines the  
123 substrate specificity of this protease, NblA presents the protein components of the  
124 phycobilisome for proteolysis. The extensive characterization of additional mutants  
125 with an *nbl* phenotype in *Synechococcus elongatus* PCC 7942 (*S. elongatus* 7942) led  
126 to the discovery of further enzymes and regulatory proteins, NblB1, NblB2, NblC, NblR  
127 and NblS, which play roles in the preprogrammed disassembly of phycobilisomes  
128 during nitrogen starvation (**Table 1**).

129

130 In contrast to these observations in *S. elongatus* 7942, the mutations of corresponding  
131 genes in *Synechocystis* 6803,  $\Delta slr1687$  (NblB homolog #2),  $\Delta slI0396$  (NblR homolog)  
132 and  $\Delta slI0698$  (NblS homolog), did not yield a nonbleaching phenotype during nitrogen  
133 depletion (32, 33). These findings suggest that, in addition to commonalities,  
134 substantial differences exist in the response of certain species to nitrogen depletion  
135 and the organization of the photosynthetic apparatus. Nevertheless, the program  
136 governing the acclimation of non-diazotrophic cyanobacteria to nitrogen starvation and  
137 the process leading to the ordered degradation of phycobilisomes and the  
138 photosynthetic pigments therein is considered as well understood.

139

#### 140 **Small proteins in Cyanobacteria**

141 The afore mentioned proteolysis adaptors NblA1 and NblA2 are small proteins of just  
142 62 and 60 residues, respectively. During standard genome analyses, small open  
143 reading frames (smORFs) encoding such proteins shorter than 70 amino acids are  
144 frequently neglected. The identification of small proteins by mass spectrometry (MS)  
145 based on shotgun proteomics is also difficult. According to their length, these proteins  
146 contain only a few or even miss cleavage sites for commonly used proteases, such as  
147 trypsin. Consequently, the number of generated peptides is smaller than that for larger  
148 proteins. Additionally, MS spectra of low abundant proteins with only a few unique  
149 peptides might not fulfill common quality criteria and are removed during filtering. Thus,  
150 the number of genes encoding small proteins has been systematically underestimated.  
151 In strong contrast is the finding that genes encoding small proteins constitute an  
152 essential genomic component in bacteria (34). Recent ribosome profiling studies in  
153 bacteria using the inhibitor of translation retapamulin suggest that a high number of  
154 previously unexplored small proteins exist in bacteria (35, 36). Detailed analyses are  
155 required to identify their functions at the molecular level.

156 Cyanobacteria provide a paradigm for small protein functions also in addition to the  
157 known NblA functions. Extensive work on the photosynthetic apparatus lead to the  
158 functional characterization of 19 small proteins with even fewer than 50 amino acids.  
159 These play indispensable roles in photosystem II (genes *psbM*, *psbT* (*ycf8*), *psbI*, *psbL*,  
160 *psbJ*, *psbY*, *psbX*, *psb30* (*ycf12*), *psbN*, *psbF*, *psbK* (37, 38)), photosystem I (*psaM*,  
161 *psaJ*, *psaI* (39)), photosynthetic electron transport (Cyt<sub>b</sub><sub>6</sub>f complex; *petL*, *petN*, *petM*,  
162 *petG* (40–42)), and photosynthetic complex I (*ndhP*, *ndhQ* (43)) or have accessory

163 functions (*hliC* (*scpB*) (44)). The shortest annotated photosynthetic protein conserved  
164 in cyanobacteria has 29 amino acids — the cytochrome *b<sub>6</sub>f* complex subunit VIII,  
165 encoded by *petN* (45).

166 We have previously analyzed the primary transcriptomes of the model cyanobacteria  
167 *Synechocystis* sp. PCC 6803 (from here *Synechocystis* 6803) and the closely related  
168 strain *Synechocystis* sp. PCC 6714 (46–48). Based on these analyses, several  
169 smORFs likely encoding previously unknown small proteins were computationally  
170 predicted. Experiments using a small 3xFLAG epitope tag fused in-frame to the  
171 second-to-last codon of the smORF under control of their native promoters and 5'UTRs  
172 validated five of these smORFs to encode small proteins (49).

173

174 Here, we analyzed one of these small proteins, the 66-residues NsiR6 (nitrogen stress-  
175 induced RNA 6), which is highly upregulated following nitrogen removal (46, 49). We  
176 show that this small protein is a crucial factor in the genetically programmed response  
177 to nitrogen starvation executing a previously unrecognized role in the coordinated  
178 disassembly of phycobilisomes. Based on the observed *nbl* phenotype, we renamed  
179 NsiR6 to NblD.

180

181

## 182 Results

### 183 Homologs of *nbID* are widely conserved within the cyanobacterial phylum.

184 The *nbID* gene in *Synechocystis* 6803 is located on the chromosome, between the  
185 genes *slr1704* encoding a hypothetical S-layer protein and *sll1575* encoding the  
186 serine-threonine protein kinase SpkA (50), at a distance of less than 2.5 kb from the  
187 *cpcBAC2C1D* operon encoding phycobilisome proteins (**Fig. 1A**). Database searches  
188 identified 176 homologs of *nbID* in species belonging to all morphological subsections  
189 (51) except section V (*Fischerella* and other cyanobacteria featuring filaments with a  
190 branching morphology). Homologous genes were also detected in the three available  
191 chromatophore genomes of photosynthetic *Paulinella* species (52). The endosymbiont  
192 chromatophore genomes have been reduced to about one-third the size of the genome  
193 of its closest free-living relatives (53). Hence, the presence of *nbID* homologs in  
194 chromatophore genomes indicates a possible important function connected to the  
195 remaining sections of its metabolism. We detected putative homologs also in two  
196 diatom-associated symbionts, *Calothrix rhizosoleniae* and *Richelia intracellularis*.  
197 However, we found no homologs in the genomes of UCYN-A "Candidatus  
198 Atelocyanobacterium thalassa" endosymbionts, which have the capacity for nitrogen  
199 fixation but lack photosystem II and phycobilisomes (54, 55), and in the well-studied  
200 model *S. elongatus* 7942. Homologs of NblD are also lacking in the genera  
201 *Prochlorococcus* and most *Acaryochloris*, which use alternative light-harvesting  
202 mechanisms. We noticed, however, the presence of a homolog in *Acaryochloris*  
203 *thomasi* RCC1774, an isolate with a very different pigmentation (56).

204 The lengths of the 176 homologs identified in this work (**Supplemental Dataset 1**) vary  
205 between 41 aa in *Crocospaera watsonii* WH 0005 and 121 aa in *Phormidesmis*  
206 *priestleyi* Ana. The alignment of selected NblD homologs highlights the presence of  
207 four conserved cysteine residues (**Fig. 1B**). Moreover, these four cysteine residues are  
208 conserved also in all other detected homologs except in 7 very short forms, which lack  
209 the first cysteine pair (**Supplemental Dataset 1**). The first pair of cysteines is arranged  
210 in a CPxCG-like motif, typical for zinc-finger structures in small proteins of bacteria and  
211 archaea (57, 58). These structures can bind metal ions and initiate loop formation,  
212 which is relevant for transcription factors. Additionally, protein-protein interaction  
213 conditioned by sulfur bonds between two cysteines is possible. To test this, we used  
214 two strains overexpressing NblD fused to a C-terminal 3xFLAG tag, one under the



215 control of its native  $P_{nbID}$  promoter and the other under the control of the copper-  
216 inducible  $P_{petE}$  promoter on plasmid pVZ322, yielding strains  $P_{nbID\_nbID3xFLAG}$  and  
217  $P_{petE\_nbID3xFLAG}$  (49). When analyzing total protein extracts from these strains by  
218 western blot analyses, we noticed a second band of higher molecular mass under  
219 nonreducing conditions but not in the presence of DTT and  $\beta$ -mercaptoethanol (**Fig.**  
220 **1C**). This result supported interaction, either as a homodimer or with another partner.  
221 Consistent with this result, the prediction tool SWISS MODEL (59) modelled NblD as  
222 a homodimer and predicted a helical segment in the most conserved part of the protein  
223 (**Fig. 1D**).

224 We conclude that *nbID* genes exist in a wide range of cyanobacteria and in  
225 chromatophore genomes of photosynthetic *Paulinella* and that the NblD protein can  
226 form dimers, might interact with other biomolecules and that a regulatory role could not  
227 be excluded.

228

## 229 **Transcriptomic analysis identifies a functional response to nitrogen step-down** 230 **in the $\Delta nbID$ mutant**

231 To identify possible effects on the regulation of gene expression, the *nbID* gene was  
232 replaced by a kanamycin resistance cassette and selected to homogeneity (**Fig. S1**).  
233 Total RNA was isolated from  $\Delta nbID$  and the wild type immediately before (0 h) and 3 h  
234 after the induction of nitrogen depletion to evaluate possible direct effects of NblD on  
235 transcription. For the genome-wide assessment of steady-state RNA levels, high-  
236 density microarrays were used that employ probes for all 8,916 previously detected  
237 transcripts originating from loci on the chromosome or seven plasmids (46, 48). The  
238 array design allows the direct hybridization of total RNA, avoiding the pitfalls of cDNA  
239 synthesis. As expected, the lack of *nbID* transcription was readily detected in the  
240 microarray, indicated by a  $\log_2$  fold change (FC) of -4.5 in the direct comparison  
241 between the expression in the wild type and  $\Delta nbID$  after 3 h of nitrogen deprivation  
242 (**Table 2**). We performed northern hybridizations to verify the transcriptomic data.  
243 While no signal was detected in  $\Delta nbID$  confirming the completeness of gene deletion,  
244 an *nbID* transcript was induced upon nitrogen starvation in the wild type, yielding a  
245 single band of ~500 nt (**Fig. 2A**). This matches the sum of the previously calculated  
246 lengths of transcriptional unit (TU) 728 and TU731 together, extending from position  
247 729645 to 730159 on the forward strand (GenBank accession no. NC\_000911) (46).

248 Hence, a transcript with a maximum length of 514 nt contains the 198 nt *nbID* reading  
249 frame positioned from nt 729671 to 729871 (including the stop codon). These data  
250 yield a 5'UTR of 26 nt and a 3'UTR of 288 nt for *nbID*. The visualization of microarray  
251 data at single-probe resolution shows the absence of signals in  $\Delta nbID$  under any  
252 condition, a very low basic expression in the wild type under nitrogen-replete conditions  
253 that was below the sensitivity threshold of the northern hybridization and an  
254 overinduction of the downstream located TU731 in  $\Delta nbID$  under nitrogen starvation  
255 (**Fig. 2B**).

256 Our transcriptomic analysis showed that typical marker genes that become normally  
257 induced upon nitrogen step-down were also induced in  $\Delta nbID$  (**Table 2**). For example,  
258 the expression of *glnB* encoding the universal nitrogen regulatory protein PII (15, 60)  
259 was increased after 3 h of nitrogen starvation in  $\Delta nbID$  by a  $\log_2FC$  of 2.5 and in wild  
260 type by 2.0 (**Table 2**). NsiR4, a regulatory sRNA that is under NtcA control (61),  
261 showed a very similar gene expression change in the mutant and in the control. The  
262 most strongly induced genes in the wild type and  $\Delta nbID$  were *nbIA1* and *nbIA2* with  
263  $\log_2FC$ s of 3.5/3.7 and 4.1/4.3, respectively. Their high induction during nitrogen  
264 starvation is consistent with previous reports (27). We noticed slightly higher  
265 expression of *nbIA1A2* in  $\Delta nbID$  than in the control. This effect, as well as the  
266 temporally correct and strong induction of transcription in the deletion mutant, was  
267 verified by northern analysis (**Fig. 2A**). The detected signal matches approximately the  
268 maximum length of the dicistronic *nbIA1A2* transcript TU1564 of 1,264 nt (46). Similar  
269 to our observation for *nbID*, this transcript is much longer than that needed to encode  
270 the small NblA proteins of 60 and 62 amino acids, and this extra length mainly belongs  
271 to a very long 3'UTR (**Fig. 2B**).

272 Some genes, such as *gifA* and *gifB*, both encoding inhibitory factors of glutamine  
273 synthetase type I, are strongly repressed upon nitrogen step-down (62). Here, we  
274 observed a  $\log_2FC$  of -4.7 in  $\Delta nbID$  and -2.4 in the control, both for *gifA* and *gifB* (**Table**  
275 **2**). Hence, also the reduction in the expression of certain genes in the absence of  
276 nitrogen was fully operational in the mutant. Moreover, the amplitudes of expression  
277 changes were even stronger in  $\Delta nbID$  than in the wild type, pointing at a possibly more  
278 pronounced nitrogen starvation effect in the mutant.

279 In addition to these marker genes for the short-term response to low nitrogen, we  
280 observed a small number of further expression changes, mainly in genes related to

281 pigment biosynthesis or storage, such as *hemF*, *nbIB1*, *nbIB2*, *hliA*, *hliB* and *hliC*  
282 (Table 2, Fig. S2).

283 Based on transcriptomic analysis, we conclude that the signaling of nitrogen deficiency  
284 through the NtcA and PII-PipX systems must have been fully functional in the  $\Delta nbID$   
285 mutant. Hence, the possibility that NblD acted as a regulator or coregulator of their  
286 expression could be excluded. **Supplemental Dataset 2** provides a genome-wide  
287 graphical overview of probe localization and the corresponding signal intensities for  
288 the wild type and  $\Delta nbID$  mutant just before and 3 h following the shift to nitrogen  
289 starvation conditions (<https://figshare.com/s/308ee7d284599fb2f085>). Additionally, the  
290 entire dataset can be accessed in the GEO database under the accession number  
291 GSE149511.

292

### 293 **Deletion of *nbID* causes a nonbleaching phenotype during nitrogen starvation**

294 To identify a possible phenotype associated with NblD, the  $\Delta nbID$  strain was analyzed.  
295 The mutant showed normal growth under nutrient-replete conditions (Fig. S3), but the  
296 phenotype differed strikingly from the wild type under nitrogen-starvation. The  
297 bleaching process was slower and less intense than that of the wild type. Using a  
298 complementation plasmid providing an *nbID* gene copy in trans under the control of its  
299 native promoter, the wild-type appearance was restored (Fig. 3A). Hence, the  
300 phenotype of the deletion mutant could be successfully rescued by complementation  
301 and the nonbleaching phenotype observed in  $\Delta nbID$  was due to the lack of NblD.

302 Because we could rule out a role of NblD as a transcription factor, we considered its  
303 function as a proteolysis adaptor, possibly analogous to NblA. However, ectopic  
304 overexpression of *nbID* under the control of the copper-inducible  $P_{petE}$  promoter did not  
305 cause bleaching (Fig. 3A), different from the effect of *nbIA* overexpression in *S.*  
306 *elongatus* 7942 (63). Therefore, NblD cannot trigger the degradation of the  
307 phycobilisome alone, distinguishing it from the activity of NblA, which is a proteolysis  
308 adapter protein (31).

309 By replacing the first two cysteines by serine residues (mutations C9S and C12S) we  
310 interrupted the first of two cysteine motifs in NblD. Introduction of this construct on a  
311 conjugative vector into  $\Delta nbID$  led to only partial complementation, indicating some  
312 functional relevance of this first cysteine motif but no absolute requirement for it.  
313 Furthermore, an introduced premature stop codon replacing the second amino acid

314 (serine) resulted in a nonbleaching phenotype, indicating that the presence of the  
315 translated NbID protein is required for the normal phenotype and not a theoretically  
316 possible regulatory feature of the transcript. Moreover, we concluded that the presence  
317 of the C-terminal triple FLAG tag did not interfere with the physiological function of  
318 NbID because complementation with a FLAG-tagged version of NbID was used to  
319 restore the wild-type appearance (**Fig. 3A**).

320 Consistent with the visual inspection, the different absorption around 630 nm in spectra  
321 taken after 48 h of nitrogen starvation indicated that photosynthetic pigments,  
322 especially phycocyanin, were still present in the nonbleaching mutants, while these  
323 were almost undetectable in wild type and complementation line (**Fig. 3B**). This  
324 difference was even more obvious when the data were normalized to the local  
325 minimum at 670 nm (**Fig. 3C**). The almost unaffected presence of phycocyanin in  
326  $\Delta nbID$  was confirmed in 77K emission spectra. We used an excitation wavelength of  
327 580 nm, which is the absorption maximum for phycocyanin, and normalized to the  
328 photosystem I emission maximum at 720 nm. The emission peak at 660 nm  
329 (overlapping peaks of bulk phycocyanin at approximately 652 nm and allophycocyanin  
330 at 665 nm) persisted in  $\Delta nbID$  at a high level in the nitrogen starvation condition.  
331 Furthermore, this peak was shifted in  $\Delta nbID$  by 2 nm to shorter wavelengths, indicating  
332 a different APC-PC ratio in favor of phycocyanin emission. A minor peak at  
333 approximately 640 nm indicated the presence of small amounts of remaining  
334 uncoupled, monomeric phycocyanin in the wild type. This peak was not detectable in  
335 wild type in the nitrogen-replete condition and in  $\Delta nbID$  in neither condition. In  
336 comparison, the 680 nm peak, which is caused by fluorescence emitted by  
337 photosystem II and the allophycocyanin terminal emitter, was reduced under nitrogen  
338 starvation in  $\Delta nbID$  similar to the wild type.

339 The high amounts of phycocyanin remaining in  $\Delta nbID$  during nitrogen starvation were  
340 present in intact phycobilisomes, because these could be isolated 24 h after nitrogen  
341 starvation was triggered, whereas wild-type phycobilisomes were already partly  
342 dismantled at this time (**Fig. S4**). Taken together, the results indicate a role of NbID in  
343 the nitrogen starvation-induced physiological program for the degradation of  
344 phycobilisomes during the acclimation to nitrogen starvation.

345

346 **NbID interacts with the phycocyanin  $\beta$  subunit**

347 To obtain insight into the molecular mechanism in which NbID is involved, pull-down  
348 experiments were performed. The previously constructed *Synechocystis* 6803  
349 *P<sub>nbID</sub>\_nbID3xFLAG* line (49) was used to produce FLAG-tagged NbID fusion protein  
350 from a plasmid pVZ322-located gene copy under the control of the native promoter.  
351 Three hours after the induction of nitrogen depletion, NbID-FLAG and bound  
352 interaction partners were immunoprecipitated from the lysate using anti-FLAG resin  
353 and were analyzed by MS (**Table 3**). After the final wash step, the resulting sample  
354 was still bound to the M2-anti-flag-resin, showing a dramatic variation in color. While  
355 the control samples appeared color-less, the samples containing the NbID-FLAG  
356 lysate kept a strong blue color, indicating the presence of likely nondegraded  
357 phycocyanin (**Fig. 4A**).

358 Despite its small size, between 7 and 9 of 9 total unique peptides of NbID were  
359 detected in these samples by MS analysis. Furthermore, it was highly abundant  
360 according to iBAQ values (64), which correspond to the total of all the peptide  
361 intensities divided by the number of observable peptides of a protein. The detection of  
362 NbID at this early time point, only 3 h after transfer to the low nitrogen condition, was  
363 consistent with and extended our observation of high *nbID* mRNA levels at this time  
364 (**Fig. 2**). By contrast, NbID was not detectable in the  $\Delta nbID$  mutant strain. Statistical  
365 analysis showed that the phycocyanin  $\alpha$ - and  $\beta$ -subunits were the only specifically  
366 enriched proteins that coimmunoprecipitated with the NbID-FLAG protein (**Fig. 4B and**  
367 **C**). Comparable results were obtained when the experiment was independently  
368 repeated and analyzed at another proteomics facility and after 24 h of nitrogen  
369 depletion (data not shown).

370 To verify the interaction proposed by the results of the MS analysis, we used  
371 recombinant NbID fused to a SUMO-6xHis tag at its N terminus in a far western blot  
372 approach (65). In this assay, the attached 6xHis tag was then recognized by an HRP-  
373 coupled-anti-penta-His-conjugate, providing a signal for proteins bound to the fusion  
374 protein (**Fig. 5A**). The signal in the blot overlapped with the phycocyanin  $\beta$ -subunit  
375 band at ~18 kDa, one of the most prominent proteins visible by SDS-PAGE (**Fig. 5B**  
376 **and C**). We included controls to eliminate nonspecific cross reaction of the fusion  
377 protein: a *Synechocystis* 6803 mutant lacking all phycocyanins ( $\Delta cpc$ , (66)) and an *E.*  
378 *coli* lysate. In both cases, we did not detect any signal, underlining the specificity of  
379 NbID binding to the phycocyanin  $\beta$ -subunit. We conclude from these experiments that  
380 NbID specifically interacts with the phycocyanin  $\beta$ -subunit; however, in the

381 coimmunoprecipitation, both subunits were enriched due to the strong natural  
382 heterodimer formation between them.

383

### 384 **The presence of *nbID* is positively selected in competition experiments**

385 We speculated that the lack of NblD might also have a growth effect. However, in short-  
386 term growth experiments, strains without the *nbID* gene showed no noticeable growth  
387 effect (**Fig. S3**) despite the strong nonbleaching phenotype under nitrogen-starvation  
388 conditions (**Fig. 3**). Therefore, we set up a growth competition experiment for a longer  
389 period in medium containing only 1 mM NaNO<sub>3</sub> as the sole source of nitrogen. In this  
390 setting, the  $\Delta nbID$  mutant was out-competed by the wild type after 12 generations (**Fig.**  
391 **S5**). These findings directly support the physiological importance of NblD, while its  
392 evolutionary conservation suggests that the presence of NblD has been under positive  
393 selection in cyanobacteria.

394

395

## 396 **Discussion**

397 The acclimation of cyanobacteria to nitrogen starvation is a complex physiological  
398 process governed by a particular genetic program (10) and involves many proteins and  
399 regulatory RNAs with different roles. The main goal of this finely tuned process is a  
400 reversible dormant state that is entered until a new source of nitrogen appears. An  
401 early major physiological effect is that photosynthesis becomes reduced and,  
402 therefore, antenna complexes are diminished. NblD, a small protein is strongly  
403 upregulated under nitrogen starvation in *Synechocystis* 6803 (49) and, as shown in  
404 this study, participates in phycobilisome disassembly. Other Nbl proteins involved in  
405 the disintegration of phycobilisome antenna complexes have been characterized in  
406 different cyanobacteria in detail, but most insight has been obtained in *S. elongatus*.  
407 The expression of *nblA* genes is strongly induced in both species under nitrogen  
408 starvation. NblA was found to interact with the phycocyanin rod antenna structure at a  
409 specific groove in the phycocyanin  $\beta$ -subunit (30) but also targeting the  
410 allophycocyanin core (67) while NblB was characterized as a chromophore-detaching  
411 protein affecting phycocyanin and allophycocyanin (68). The likely ortholog of the *S.*  
412 *elongatus* NblB in *Synechocystis* 6803 is NblB1, whose expression under nitrogen  
413 starvation was decreased (**Table 2**), like the *S. elongatus* gene (68). It is noteworthy

414 that knockout mutants of homologs to five *S. elongatus nbl* genes were tested in  
415 *Synechocystis* 6803, but only  $\Delta nblA1$  and  $\Delta nblA2$  displayed the non-bleaching  
416 phenomenon (32). Later on,  $\Delta sll1961$  was discovered to also yield this phenotype (69).  
417 Hence,  $\Delta nblD$  is only the fourth mutant with the *nbl* phenotype in *Synechocystis* 6803.  
418 In our coimmunoprecipitation and far western blot analyses, we observed the  
419 interaction of NblD with the phycocyanin  $\beta$ -subunit, which is a striking parallel to NblA,  
420 the main factor for phycobilisome knockdown by recruitment of a Clp-like protease (31,  
421 70). However, we can rule out a function of NblD as protease adaptor because no  
422 protease subunits were found in our interaction screens and its ectopic overexpression  
423 under nutrient-replete conditions did not trigger bleaching. We also did not find an  
424 interaction with NblA or a likely direct regulatory effect excluding roles as co-effector of  
425 NblA or as transcription factor. The only detected interaction was with the CpcB subunit  
426 and likely in its chromophorylated state. Phycocyanobilin chromophores are covalently  
427 bound to phycocyanin at  $\alpha$ Cys84,  $\beta$ Cys84 and  $\beta$ Cys155 and are generally still visible  
428 by zinc staining even during SDS-PAGE and in protein pull-down experiments (**Fig.**  
429 **4A**). These features enabled the far western blot signal for tagged NblD as bait protein  
430 bound to the chromophorylated target on the membrane. The chromophores likely also  
431 stayed covalently bound to their binding partner in MS enabling the interaction with  
432 NblD. Moreover, we found that in the absence of NblD the chromophorylated target  
433 remained highly abundant and under nitrogen depletion. These findings point at a  
434 pivotal role of NblD in dealing with the phycocyanin linear tetrapyrrole moieties during  
435 the early stages of nitrogen starvation. Their uncontrolled release potentially triggers  
436 the formation of oxygen radicals and toxic side effects causing redox stress. Indeed,  
437 we detected some evidence for this hypothesis in our transcriptome analysis, three of  
438 four *hli* genes and the *hliB/scpD* cotranscribed *lilA* (*slr1544*) were induced in  $\Delta nblD$   
439 (**Table 2, Fig. S2**). These genes encode small proteins with an anticipated function in  
440 transiently storing chlorophyll molecules during situations causing stress for the  
441 photosynthetic apparatus (71–73). Furthermore, the levels of other transcripts  
442 encoding proteins known to participate in redox stress responses, like *pgr5* (*ssr2016*)  
443 and *sigD* (*sll2012*) were slightly increased in the mutant (**Table 2, Fig. S2**).  
444 According to our data, NblD is a novel factor in the genetic program governing the  
445 acclimation response to nitrogen starvation (**Fig. 6**). We propose a hierarchically  
446 organized process of phycobilisome degradation, with NblD starting above NblA in  
447 *Synechocystis* 6803. In this case, NblD might improve the accessibility to the

448 phycocyanin for NblA. Consequently, if any component is missing in the chain of the  
449 nitrogen starvation-triggered disassembly process, a nonbleaching phenotype is  
450 obtained. Hence, NblD could interact with the chromophorylated phycocyanin in  
451 *Synechocystis* 6803 and bind the phycocyanobilin pigments by disulfide bonds  
452 because NblD contains four cysteines arranged in two clusters. We show that a change  
453 in the first pair of cysteines results in an appearance similar to the knock-out (**Fig. 3A,**  
454 **B**); thus, an important function of these conserved amino acids can be inferred.  
455 We show that NblD is a novel factor in the process that leads to the coordinated  
456 dismantling of phycobilisomes. Similar to the NblA proteins that label phycobiliproteins  
457 for proteolysis, NblD binds to phycocyanin polypeptides but has a different function.  
458 The results show that, even in a well-studied process such as the bleaching response,  
459 small proteins can perform crucial functions that have been overlooked thus far.  
460  
461



## 462 **Materials and Methods**

### 463 **Cultivation conditions**

464 Strains were maintained in copper-free BG11 (51) supplemented with 20 mM TES  
465 adjusted to a pH of 7.5 at 30°C under continuous white light of 50  $\mu\text{mol photons m}^{-2} \text{s}^{-1}$ .  
466 Mutant strains containing pVZ322 were cultivated in the presence of 50  $\mu\text{g/mL}$   
467 kanamycin and 25  $\mu\text{g/mL}$  gentamycin, while 50  $\mu\text{g/mL}$  of kanamycin was added to  
468 cultures of the knockout strain. To deplete cells from nitrogen, the cultures were  
469 centrifuged, the cell pellets were washed and resuspended in BG11 without  $\text{NaNO}_3$   
470 (BG11-N). For phenotypic assays, the experimental cultures were grown in medium  
471 supplemented with copper lacking antibiotics to prevent any possible effect.

### 472 **Construction of mutant and overexpression lines**

473 Using the *Synechocystis* 6803 PCC-M strain (74) as the wild-type and background  
474 strain, different mutants were constructed. Strains in which *nbID* expression can be  
475 induced via the  $\text{Cu}^{2+}$ -inducible *petE* promoter or controlled via its native promoter on  
476 pVZ322-based plasmids have been described previously (49). Knockout mutants were  
477 generated by homologous replacement of the *nbID* coding sequence with a kanamycin  
478 resistance cassette (*nptII*) and using pUC19 as a vector for subcloning. The construct  
479 for gene replacement by homologous recombination was generated by PCR-based  
480 AQUA cloning (75) using primers as given in **Table S1**. Total segregation was checked  
481 by colony PCR using the primers segregation\_nbID\_KO fwd/rev and nbID\_Km\_seq  
482 fwd/rev.

483 To complement the knockout, the self-replicating pVZ322 plasmid encoding different  
484 versions of *nbID* were used (primers and vectors are listed in **Tables S1** and **S2**):

- 485 1. Encoding *nbID* under control of its native promoter (49) to restore wild type;
- 486 2. Same plasmid with a cysteine mutated version of NblD (C9S & C12S);
- 487 3. Same plasmid with a premature stop codon (Ser2"STOP").

488 The inserts for pVZ322 were assembled into pUC19 by AQUA cloning and then  
489 digested, as well as the target pVZ322 vector backbone, for 3.5 h at 37°C by *XbaI* and  
490 *PstI*, producing compatible ligation sites. Fragments were combined and ligated with  
491 T4 DNA Ligase (Thermo Scientific) for 4 h at room temperature (RT) and were  
492 propagated in *E. coli*. The completed plasmids were introduced into *Synechocystis*  
493 6803 by conjugation (76). The expression levels of *nbID* in the different lines was

494 checked by northern hybridization using a <sup>32</sup>P-labeled, single-stranded RNA probe  
495 produced using primers T7\_nsiR6\_probe fwd/rev.

#### 496 **RNA preparation, microarray analysis and northern blot verification**

497 The cultures were starved for nitrogen (-N) for 3 h, 6 h and 24 h to induce *nbID*  
498 expression. The time immediately before nitrogen removal (0 h) served as the negative  
499 control. After harvesting the culture by filtering through hydrophilic polyethersulfone  
500 filters (Pall Supor®-800, 0.8 µm) and immersion in PGTX (77), the samples were snap  
501 frozen in liquid nitrogen. RNA isolation was performed as stated previously (78). For  
502 northern blot verification, 3 µg of RNA was loaded per well on a denaturing agarose  
503 gel and was blotted via capillary blot to Hybond™ -N+ membrane (GE Healthcare). The  
504 membranes were probed with [<sup>32</sup>P]UTP-labeled transcripts generated using the  
505 MAXIscript® T7 *In Vitro* Transcription Kit (Ambion) and primers T7\_nsiR6\_probe  
506 fwd/rev and T7\_nblA\_probe fwd/rev as described previously (79). The resulting signal  
507 was evaluated by phosphorimaging using a Typhoon™ FLA 9500 scanner (GE  
508 Healthcare). For microarray analysis, we followed the previously published protocol  
509 including direct RNA labeling (80) but using 5 µg of total RNA from the time points 0 h  
510 and 3 h -N for wild type and  $\Delta nbID$ . For hybridization, 500 ng Cy3-labeled RNA was  
511 applied. The microarray included a duplicate for each sample.

#### 512 **Protein preparation, proteomic sample preparation and analyses by MS**

513 Cells to prepare total protein samples were collected by centrifugation (3,200 × *g*, 10  
514 min, RT), washed in saline (PBS) supplemented with Protease Inhibitor (cOmplete,  
515 Roche) and resuspended in the same buffer. For cell lysis, mechanical disruption using  
516 a prechilled Precellys homogenizer (Bertin Technologies) was used. To remove cell  
517 debris and glass beads, the culture was centrifuged (1000 × *g*, 5 min, 4°C), and the  
518 supernatant was collected for further analysis. Western blots targeting FLAG-tagged  
519 proteins were performed using FLAG® M2 monoclonal antibody (Sigma) as described  
520 previously (49).

521 To prepare FLAG-tagged NbID and interacting proteins from total cell lysates and to  
522 process mock samples, ANTI-FLAG M2 affinity agarose gels (Sigma) were used. The  
523 expression of *nbID* was induced in exponentially growing cultures (800 mL at OD 0.8)  
524 by removing nitrogen. After another 3 h of cultivation, the cells were harvested by  
525 centrifugation (4000 × *g*, 4°C, 10 min). Cell lysates were obtained as described above  
526 (except using FLAG buffer instead of PBS) and then were incubated for 45 min in the

527 presence of 2% n-dodecyl  $\beta$ -D-maltoside to solubilize membrane proteins in the dark  
528 at 4°C. After loading the lysate into the packed volume of 100  $\mu$ L of FLAG agarose on  
529 a gravity column (Bio-Rad) and reloading the flow through twice, bound proteins were  
530 washed 3 times with FLAG buffer (50 mM HEPES-NaOH pH 7, 5 mM MgCl<sub>2</sub>, 25 mM  
531 CaCl<sub>2</sub>, 150 mM NaCl, 10% glycerol, 0.1% Tween-20) and twice with FLAG buffer  
532 lacking glycerol and Tween-20.

533 To achieve maximum reproducibility, protein analyses by MS were performed in two  
534 different laboratories and repeated several times. To obtain MS-data, elution was  
535 performed using 0.2% RapiGest (Waters) in 0.1 M HEPES pH 8 (MS-grade) and  
536 heating for 10 min to 95°C. The RapiGest concentration was decreased to 0.1% by  
537 adding 0.1 M HEPES pH 8. The proteins were reduced by incubating in 5 mM  
538 dithiothreitol (DTT) and alkylated using 15 mM iodacetamide (IAM) in the dark, each  
539 step performed for 20 min at 37°C. Tryptic digestion was performed in two steps; first  
540 with 1  $\mu$ g of trypsin for 2 h at 50°C and second with another 1  $\mu$ g overnight at 37°C,  
541 both shaking at 600 rpm. The peptides were desalted by acidification of the sample to  
542 0.3% TFA final concentration and applying HyperSep C18 tips (ThermoScientific).  
543 Thereafter, the peptide concentration was measured using the BCA assay  
544 (ThermoScientific). For MS analysis, 500 ng of peptide per sample was analyzed using  
545 the EASY-nLC™ 1000 UHPLC system (ThermoScientific) coupled to a Q-Exactive  
546 plus™ Hybrid Quadrupole-Orbitrap™ Mass Spectrometer (ThermoScientific) as  
547 previously described (81). Raw data were processed and analyzed with MaxQuant  
548 (Version 1.6.0.16) using cyanobase (82) data for *Synechocystis* 6803 (Version  
549 2018/08/01) including the small proteins described in reference (49). The proteome  
550 raw data acquired by MS were deposited at the ProteomeXchange Consortium  
551 (<http://proteomecentral.proteomexchange.org>) via the PRIDE partner repository (83)  
552 under the identifier PXD019019. The intensities were compared using LFQ (label-free  
553 quantification) values (84) as illustrated in **Fig. S6** with Perseus (version 1.6.1.3 (85)).  
554 In summary, contaminants, reverse sequences and proteins only identified by site were  
555 removed from the matrix and LFQ intensities were log<sub>2</sub>-transformed. Before t-test and  
556 visualization using a volcano plot, the missing values were replaced by imputation with  
557 the normal distribution for each column separately (default settings). For hierarchical  
558 clustering (default parameters), only proteins with three valid values in at least one  
559 declared group (NblD\_3xFLAG and  $\Delta$ nblD) were considered.

560

## 561 **SDS-PAGE and standard western blotting**

562 Proteins were mixed with denaturing and reducing loading dye (5× concentrated: 250  
563 mM Tris-HCl pH 6.8, 25% glycerol, 10% SDS, 500 mM DTT, and 0.05% bromophenol  
564 blue G-250). Moreover, 6% β-mercaptoethanol v/v was added fresh to each sample.  
565 The protein samples were separated by either 15% SDS-glycine-PAGE or SDS-tricine-  
566 PAGE including the Precision Plus Protein Dual Xtra molecular weight marker (Bio-  
567 Rad). To run samples under nonreducing conditions, a native loading dye (4×  
568 concentrated: 30% glycerol, 0.05% bromophenol blue G-250, 150 mM Tris-HCl pH 7.5)  
569 was used. Gels were stained using either 20 mM zinc sulfate-7-hydrate for reversible  
570 zinc staining of chromophores and/or InstantBlue™ Coomassie staining (Expedeon).  
571 Otherwise, western blots followed a standard procedure as described elsewhere (49).

## 572 **Far western blotting**

573 Far western blotting was performed as described previously (65) using purified NbID-  
574 SUMO-His-tag fusion protein as the primary antibody. The protein was recombinantly  
575 expressed in the *E. coli* ROSETTA strain (Merck) using pE-SUMO as an expression  
576 plasmid (86) and was isolated using a 1-mL HisTrap column and Äkta start (GE  
577 Healthcare). Before using the fusion protein for far western blotting, it was desalted  
578 and concentrated (Vivaspin 20, 10,000 Da MWCO). In the denaturing/renaturing steps  
579 of the blotted membrane, milk powder was omitted compared with the protocol  
580 provided by Wu *et al.* (65). Between steps, the membrane was washed with TBS-T  
581 (20 mM Tris pH 7.6, 150 mM NaCl, 0.1% (v/v) Tween-20). After blocking the renatured  
582 membrane with 5% milk powder in TBS-T, 3 µg/mL of fusion protein was used as the  
583 'primary antibody' and was incubated at 4°C for at least 6 h. His-Penta-Conjugate  
584 (Qiagen) was then used as the secondary antibody (1:5000), targeting the 6×His-Tag  
585 of the NbID-fusion protein, with shaking at 4°C for a minimum of 6 h. The membranes  
586 were washed in between the single steps at least twice with TBS-T for 5 min at RT.  
587 The signals were visualized by applying ECL-spray (Advansta) to the membrane and  
588 using a Fusion FX (Vilber) imager.

## 589 **Spectrometric measurements**

590 Whole-cell absorption spectra were measured using a Specord® 250 Plus (Analytik  
591 Jena) spectrophotometer at room temperature and were normalized to 750 nm.  
592 Cultures at an OD<sub>750</sub> > 1 were diluted with 1× BG11 prior to taking the absorption  
593 spectra.

594 Emission and absorption spectra at 77K were recorded using a FluoroMax (HORIBA  
595 Jobin Yvon) spectrofluorometer. If necessary, the cultures were diluted in PBS buffer  
596 to avoid saturation effects during measurement. Emission spectra were excited with  
597 580 nm and measured 3 times, and curves were averaged; additionally, absorption  
598 spectra were measured 5 times and curves were averaged. In both cases, the slits  
599 were set to 5 nm and the integration time was 1 s.

## 600 **Phycobilisome isolation**

601 Phycobilisome isolation was performed by adapting a previously described procedure  
602 (87). Cells were harvested at exponential OD by centrifugation and were washed once  
603 in 0.75 M potassium phosphate buffer ( $K_2HPO_4/KH_2PO_4$ ) pH 7 (KP-buffer).  
604 Resuspended in the same buffer, the cells were disrupted by two passages through a  
605 French pressure cell. Thereafter, the lysate was solubilized with 2% Triton X-100 for  
606 10 min at room temperature with shaking. Debris and insoluble components were  
607 removed by centrifugation at  $21000 \times g$  for 15 min. The supernatant was loaded onto  
608 a sucrose step gradient with 1.5 M, 1 M, 0.75 M and 0.5 M sucrose dissolved in KP-  
609 buffer. The blue fraction was collected and precipitated using DOC/TCA precipitation  
610 before SDS-PAGE.

## 611 **Competition growth assay**

612 According to Klähn *et al.* (61), wild-type and knockout cultures were grown in  
613 precultures without antibiotics separately and then were mixed to equal cell numbers  
614 in triplicate in 1 mM  $NaNO_3$  limited BG11 to a final  $OD_{750}$  of 0.2. The cell numbers were  
615 calculated by microscopic counting and  $OD_{750}$  measurement. In parallel, separate  
616 control strains of the wild type and  $\Delta nbID$  were grown in limited medium. Every 3 to 4  
617 days, the cultures were diluted to an  $OD_{750}$  of 0.2. Additionally, 2.5  $\mu L$  of 1:10 and  
618 1:100 diluted cultures were spotted on nitrogen-replete BG11 agar plates containing  
619 either no antibiotics or 40  $\mu g/mL$  of kanamycin. The growth of all cultures was  
620 documented by scanning the plates using an EPSON scanner. The colonies were  
621 counted, and the cell numbers were calculated and compared with controls.  
622 Furthermore, the cultures were checked by PCR for their allele composition using the  
623 primers *nbID*\_Km\_seq fwd/rev.

624

## 625 **Acknowledgments**

626 We are very grateful to Tasios Melis, University of California, Berkeley, who kindly  
627 provided the phycocyanin mutant for the far western blot analysis. It was a great  
628 pleasure to work with your strain! The authors also thank Martin Hagemann (Rostock),  
629 Jörg Soppa and Harald Schwalbe (both Frankfurt) and Annegret Wilde (Freiburg) for  
630 helpful discussions. Furthermore, we thank Viktoria Reimann for helping with the  
631 microarray and Stefan Tuskan for support in setting up the competition assay  
632 experiment.

633

## 634 **Funding**

635 We appreciate the support by the Deutsche Forschungsgemeinschaft (DFG, German  
636 Research Foundation) to WRH through the priority program “Small Proteins in  
637 Prokaryotes, an Unexplored World” SPP 2002 (grant DFG HE2544/12-1), to PS, BM  
638 and WRH through the research group FOR2816 “SCyCode” and to VK, OS and WRH  
639 through the graduate school MelnBio - 322977937/GRK2344. OS acknowledges  
640 support by DFG (SCHI 871/11-1).

641

## 642 **Conflict of interest**

643 The authors declare that they have no conflict of interest.

644

## 645 **Author Contributions**

646 WRH designed the project and secured funding. MF, OS, PS and BM carried out MS  
647 -based proteomic analyses. CS supported the microarray visualization and  
648 spectroscopic analyses, NFD contributed to the pigment analysis and data  
649 interpretation. All other experiments and analyses were performed by VK. VK and  
650 WRH wrote the manuscript with input from all authors.

651

652

## 653 References

- 654 1. M. M. M. Kuypers, H. K. Marchant, B. Kartal, The microbial nitrogen-cycling  
655 network. *Nat. Rev. Microbiol.* **16**, 263–276 (2018).
- 656 2. P. M. Vitousek, R. W. Howarth, Nitrogen limitation on land and in the sea: how  
657 can it occur? *Biogeochemistry* **13**, 87–115 (1991).
- 658 3. S. J. Biller, P. M. Berube, D. Lindell, S. W. Chisholm, *Prochlorococcus*: the  
659 structure and function of collective diversity. *Nat. Rev. Microbiol.* **13**, 13–27  
660 (2015).
- 661 4. P. Flombaum, *et al.*, Present and future global distributions of the marine  
662 Cyanobacteria *Prochlorococcus* and *Synechococcus*. *Proc Natl Acad Sci USA*  
663 **110**, 9824–9829 (2013).
- 664 5. F. Partensky, W. R. Hess, D. Vaultot, *Prochlorococcus*, a marine photosynthetic  
665 prokaryote of global significance. *Microbiol Mol Biol Rev* **63**, 106–127 (1999).
- 666 6. M. Hagemann, W. R. Hess, Systems and synthetic biology for the biotechnological  
667 application of cyanobacteria. *Curr Opin Biotechnol* **49**, 94–99 (2018).
- 668 7. D. Vijay, M. K. Akhtar, W. R. Hess, Genetic and metabolic advances in the  
669 engineering of cyanobacteria. *Curr. Opin. Biotechnol.* **59**, 150–156 (2019).
- 670 8. R. Schwarz, K. Forchhammer, Acclimation of unicellular cyanobacteria to  
671 macronutrient deficiency: emergence of a complex network of cellular responses.  
672 *Microbiology* **151**, 2503–2514 (2005).
- 673 9. K. Forchhammer, R. Schwarz, Nitrogen chlorosis in unicellular cyanobacteria - a  
674 developmental program for surviving nitrogen deprivation. *Environ. Microbiol.* **21**,  
675 1173–1184 (2019).
- 676 10. A. Klotz, *et al.*, Awakening of a dormant cyanobacterium from nitrogen chlorosis  
677 reveals a genetically determined program. *Curr. Biol.* **26**, 2862–2872 (2016).
- 678 11. M. F. Vázquez-Bermúdez, A. Herrero, E. Flores, 2-Oxoglutarate increases the  
679 binding affinity of the NtcA (nitrogen control) transcription factor for the  
680 *Synechococcus glnA* promoter. *FEBS Lett.* **512**, 71–74 (2002).
- 681 12. R. Tanigawa, *et al.*, Transcriptional activation of NtcA-dependent promoters of  
682 *Synechococcus* sp. PCC 7942 by 2-oxoglutarate in vitro. *Proc. Natl. Acad. Sci.*  
683 **99**, 4251–4255 (2002).
- 684 13. J. Espinosa, K. Forchhammer, S. Burillo, A. Contreras, Interaction network in  
685 cyanobacterial nitrogen regulation: PipX, a protein that interacts in a 2-  
686 oxoglutarate dependent manner with PII and NtcA. *Mol. Microbiol.* **61**, 457–469  
687 (2006).
- 688 14. J. Espinosa, *et al.*, PipX, the coactivator of NtcA, is a global regulator in  
689 cyanobacteria. *Proc. Natl. Acad. Sci.* **111**, E2423–E2430 (2014).
- 690 15. A. Forcada-Nadal, J. L. Llácer, A. Contreras, C. Marco-Marín, V. Rubio, The PII-  
691 NAGK-PipX-NtcA regulatory axis of cyanobacteria: A tale of changing partners,  
692 allosteric effectors and non-covalent interactions. *Front. Mol. Biosci.* **5**, 91 (2018).
- 693 16. M. I. Muro-Pastor, J. C. Reyes, F. J. Florencio, Cyanobacteria perceive nitrogen  
694 status by sensing intracellular 2-oxoglutarate levels. *J. Biol. Chem.* **276**, 38320–  
695 38328 (2001).
- 696 17. J. Giner-Lamia, *et al.*, Identification of the direct regulon of NtcA during early  
697 acclimation to nitrogen starvation in the cyanobacterium *Synechocystis* sp. PCC  
698 6803. *Nucleic Acids Res.* **45**, 11800–11820 (2017).
- 699 18. A. N. Glazer, Phycobilisomes in *Methods in Enzymology*, (Elsevier, 1988), pp.  
700 304–312.
- 701 19. R. MacColl, Cyanobacterial phycobilisomes. *J. Struct. Biol.* **124**, 311–334 (1998).

- 702 20. A. R. Grossman, M. R. Schaefer, G. G. Chiang, J. L. Collier, The phycobilisome,  
703 a light-harvesting complex responsive to environmental conditions. *Microbiol.*  
704 *Rev.* **57**, 725–749 (1993).
- 705 21. M. M. Allen, A. J. Smith, Nitrogen chlorosis in blue-green algae. *Arch. Für*  
706 *Mikrobiol.* **69**, 114–120 (1969).
- 707 22. J. L. Collier, A. R. Grossman, Chlorosis induced by nutrient deprivation in  
708 *Synechococcus* sp. strain PCC 7942: not all bleaching is the same. *J. Bacteriol.*  
709 **174**, 4718–4726 (1992).
- 710 23. P. Spät, A. Klotz, S. Rexroth, B. Maček, K. Forchhammer, Chlorosis as a  
711 developmental program in cyanobacteria: The proteomic fundament for survival  
712 and awakening. *Mol. Cell. Proteomics* **17**, 1650–1669 (2018).
- 713 24. M. Görl, J. Sauer, T. Baier, K. Forchhammer, Nitrogen-starvation-induced  
714 chlorosis in *Synechococcus* PCC 7942: adaptation to long-term survival.  
715 *Microbiol.* **144**, 2449–2458 (1998).
- 716 25. J. L. Collier, A. R. Grossman, A small polypeptide triggers complete degradation  
717 of light-harvesting phycobiliproteins in nutrient-deprived cyanobacteria. *EMBO J.*  
718 **13**, 1039–1047 (1994).
- 719 26. R. Schwarz, A. R. Grossman, A response regulator of cyanobacteria integrates  
720 diverse environmental signals and is critical for survival under extreme conditions.  
721 *Proc. Natl. Acad. Sci.* **95**, 11008–11013 (1998).
- 722 27. K. Baier, S. Nicklisch, C. Grundner, J. Reinecke, W. Lockau, Expression of two  
723 *nblA*-homologous genes is required for phycobilisome degradation in nitrogen-  
724 starved *Synechocystis* sp. PCC6803. *FEMS Microbiol. Lett.* **195**, 35–39 (2001).
- 725 28. I. Luque, *et al.*, The NblA protein from the filamentous cyanobacterium  
726 *Tolypothrix* PCC 7601: regulation of its expression and interactions with  
727 phycobilisome components. *Mol. Microbiol.* **50**, 1043–1054 (2003).
- 728 29. R. Bienert, K. Baier, R. Volkmer, W. Lockau, U. Heinemann, Crystal structure of  
729 NblA from *Anabaena* sp. PCC 7120, a small protein playing a key role in  
730 phycobilisome degradation. *J. Biol. Chem.* **281**, 5216–5223 (2006).
- 731 30. A. Y. Nguyen, *et al.*, The proteolysis adaptor, NblA, binds to the N-terminus of  $\beta$ -  
732 phycocyanin: Implications for the mechanism of phycobilisome degradation.  
733 *Photosynth. Res.* **132**, 95–106 (2017).
- 734 31. A. Karradt, J. Sobanski, J. Mattow, W. Lockau, K. Baier, NblA, a key protein of  
735 phycobilisome degradation, interacts with ClpC, a HSP100 chaperone partner of  
736 a cyanobacterial Clp protease. *J. Biol. Chem.* **283**, 32394–32403 (2008).
- 737 32. H. Li, L. Sherman, Characterization of *Synechocystis* sp. strain PCC 6803 and  
738  $\Delta nbl$  mutants under nitrogen-deficient conditions. *Arch. Microbiol.* **178**, 256–266  
739 (2002).
- 740 33. G. Zabulon, C. Richaud, C. Guidi-Rontani, J.-C. Thomas, NblA Gene Expression  
741 in *Synechocystis* PCC 6803 Strains Lacking DspA (Hik33) and a NblR-like  
742 Protein. *Curr. Microbiol.* **54**, 36–41 (2007).
- 743 34. M. Lluch-Senar, *et al.*, Defining a minimal cell: essentiality of small ORFs and  
744 ncRNAs in a genome-reduced bacterium. *Mol. Syst. Biol.* **11**, 780 (2015).
- 745 35. S. Meydan, *et al.*, Retapamulin-Assisted Ribosome Profiling Reveals the  
746 Alternative Bacterial Proteome. *Mol. Cell* **74**, 481-493.e6 (2019).
- 747 36. J. Weaver, F. Mohammad, A. R. Buskirk, G. Storz, Identifying small proteins by  
748 ribosome profiling with stalled initiation complexes. *mBio* **10** (2019).
- 749 37. A. Guskov, *et al.*, Cyanobacterial photosystem II at 2.9-Å resolution and the role  
750 of quinones, lipids, channels and chloride. *Nat. Struct. Mol. Biol.* **16**, 334–342  
751 (2009).



- 752 38. Y. Kashino, *et al.*, Proteomic analysis of a highly active photosystem II preparation  
753 from the cyanobacterium *Synechocystis* sp. PCC 6803 reveals the presence of  
754 novel polypeptides. *Biochemistry* **41**, 8004–8012 (2002).
- 755 39. P. Fromme, A. Melkozernov, P. Jordan, N. Krauss, Structure and function of  
756 photosystem I: interaction with its soluble electron carriers and external antenna  
757 systems. *FEBS Lett.* **555**, 40–44 (2003).
- 758 40. D. Baniulis, *et al.*, Structure-function, stability, and chemical modification of the  
759 cyanobacterial cytochrome b6f complex from *Nostoc* sp. PCC 7120. *J. Biol.*  
760 *Chem.* **284**, 9861–9869 (2009).
- 761 41. J. F. Allen, Cytochrome b6f: structure for signalling and vectorial metabolism.  
762 *Trends Plant Sci.* **9**, 130–137 (2004).
- 763 42. D. Schneider, T. Volkmer, M. Rögner, PetG and PetN, but not PetL, are essential  
764 subunits of the cytochrome b6f complex from *Synechocystis* PCC 6803. *Res.*  
765 *Microbiol.* **158**, 45–50 (2007).
- 766 43. M. M. Nowaczyk, *et al.*, NdhP and NdhQ: two novel small subunits of the  
767 cyanobacterial NDH-1 complex. *Biochemistry* **50**, 1121–1124 (2011).
- 768 44. J. Knoppová, *et al.*, Discovery of a chlorophyll binding protein complex involved  
769 in the early steps of photosystem II assembly in *Synechocystis*. *Plant Cell* **26**,  
770 1200–1212 (2014).
- 771 45. E. C. Hobbs, F. Fontaine, X. Yin, G. Storz, An expanding universe of small  
772 proteins. *Curr. Opin. Microbiol.* **14**, 167–173 (2011).
- 773 46. M. Kopf, *et al.*, Comparative analysis of the primary transcriptome of  
774 *Synechocystis* sp. PCC 6803. *DNA Res.* **21**, 527–539 (2014).
- 775 47. M. Kopf, S. Klähn, I. Scholz, W. R. Hess, B. Voß, Variations in the non-coding  
776 transcriptome as a driver of inter-strain divergence and physiological adaptation  
777 in bacteria. *Sci. Rep.* **5**, 9560 (2015).
- 778 48. J. Mitschke, *et al.*, An experimentally anchored map of transcriptional start sites  
779 in the model cyanobacterium *Synechocystis* sp. PCC6803. *Proc. Natl. Acad. Sci.*  
780 **108**, 2124–2129 (2011).
- 781 49. D. Baumgartner, M. Kopf, S. Klähn, C. Steglich, W. R. Hess, Small proteins in  
782 cyanobacteria provide a paradigm for the functional analysis of the bacterial  
783 micro-proteome. *BMC Microbiol.* **16**, 285 (2016).
- 784 50. A. Kamei, T. Yuasa, K. Orikawa, X. X. Geng, M. Ikeuchi, A eukaryotic-type protein  
785 kinase, SpkA, is required for normal motility of the unicellular Cyanobacterium  
786 *Synechocystis* sp. strain PCC 6803. *J. Bacteriol.* **183**, 1505–1510 (2001).
- 787 51. R. Rippka, J. Deruelles, J. B. Waterbury, M. Herdman, R. Y. Stanier, Generic  
788 assignments, strain histories and properties of pure cultures of cyanobacteria.  
789 *Microbiology* **111**, 1–61 (1979).
- 790 52. D. Lhee, *et al.*, Evolutionary dynamics of the chromatophore genome in three  
791 photosynthetic *Paulinella* species. *Sci. Rep.* **9**, 1–11 (2019).
- 792 53. E. C. M. Nowack, M. Melkonian, G. Glöckner, Chromatophore genomes sequence  
793 of *Paulinella* sheds light on acquisition of photosynthesis by eukaryotes. *Curr.*  
794 *Biol.* **18**, 410–418 (2008).
- 795 54. D. Bombar, P. Heller, P. Sanchez-Baracaldo, B. J. Carter, J. P. Zehr, Comparative  
796 genomics reveals surprising divergence of two closely related strains of  
797 uncultivated UCYN-A cyanobacteria. *ISME J.* **8**, 2530–2542 (2014).
- 798 55. J. P. Zehr, *et al.*, Globally distributed uncultivated oceanic N<sub>2</sub>-fixing cyanobacteria  
799 lack oxygenic photosystem II. *Science* **322**, 1110–1112 (2008).
- 800 56. F. Partensky, *et al.*, A novel species of the marine cyanobacterium *Acaryochloris*  
801 with a unique pigment content and lifestyle. *Sci. Rep.* **8** (2018).

- 802 57. S. S. Krishna, I. Majumdar, N. V. Grishin, Structural classification of zinc fingers:  
803 survey and summary. *Nucleic Acids Res.* **31**, 532–550 (2003).
- 804 58. V. Y. Tarasov, *et al.*, A small protein from the bop–brp intergenic region of  
805 Halobacterium salinarum contains a zinc finger motif and regulates bop and crtB1  
806 transcription. *Mol. Microbiol.* **67**, 772–780 (2008).
- 807 59. A. Waterhouse, *et al.*, SWISS-MODEL: homology modelling of protein structures  
808 and complexes. *Nucleic Acids Res.* **46**, W296–W303 (2018).
- 809 60. B. Watzer, *et al.*, The signal transduction protein PII controls ammonium, nitrate  
810 and urea uptake in cyanobacteria. *Front. Microbiol.* **10**, 1428 (2019).
- 811 61. S. Klähn, *et al.*, The sRNA NsiR4 is involved in nitrogen assimilation control in  
812 cyanobacteria by targeting glutamine synthetase inactivating factor IF7. *Proc.*  
813 *Natl. Acad. Sci.* **112**, E6243–E6252 (2015).
- 814 62. M. García-Domínguez, J. C. Reyes, F. J. Florencio, NtcA represses transcription  
815 of *gifA* and *gifB*, genes that encode inhibitors of glutamine synthetase type I from  
816 *Synechocystis* sp. PCC 6803. *Mol. Microbiol.* **35**, 1192–1201 (2000).
- 817 63. N. Dolganov, A. R. Grossman, A polypeptide with similarity to phycocyanin  $\alpha$ -  
818 subunit phycocyanobilin lyase involved in degradation of phycobilisomes. *J.*  
819 *Bacteriol.* **181**, 610–617 (1999).
- 820 64. B. Schwanhäusser, *et al.*, Global quantification of mammalian gene expression  
821 control. *Nature* **473**, 337–342 (2011).
- 822 65. Y. Wu, Q. Li, X.-Z. Chen, Detecting protein–protein interactions by far western  
823 blotting. *Nat. Protoc.* **2**, 3278–3284 (2007).
- 824 66. H. Kirst, C. Formighieri, A. Melis, Maximizing photosynthetic efficiency and culture  
825 productivity in cyanobacteria upon minimizing the phycobilisome light-harvesting  
826 antenna size. *Biochim. Biophys. Acta BBA - Bioenerg.* **1837**, 1653–1664 (2014).
- 827 67. E. Sendersky, *et al.*, The proteolysis adaptor, NblA, is essential for degradation of  
828 the core pigment of the cyanobacterial light-harvesting complex. *Plant J.* **83**, 845–  
829 852 (2015).
- 830 68. M. Levi, E. Sendersky, R. Schwarz, Decomposition of cyanobacterial light  
831 harvesting complexes: NblA-dependent role of the bilin lyase homolog NblB. *Plant*  
832 *J.* **94**, 813–821 (2018).
- 833 69. H. Sato, T. Fujimori, K. Sonoike, sll1961 is a novel regulator of phycobilisome  
834 degradation during nitrogen starvation in the cyanobacterium *Synechocystis* sp.  
835 PCC 6803. *FEBS Lett.* **582**, 1093–1096 (2008).
- 836 70. A. Baier, W. Winkler, T. Korte, W. Lockau, A. Karradt, Degradation of  
837 phycobilisomes in *Synechocystis* sp. PCC6803: evidence for essential formation  
838 of an NblA1/NblA2 heterodimer and its codegradation by a Clp protease complex.  
839 *J. Biol. Chem.* **289**, 11755–11766 (2014).
- 840 71. O. Cheregi, C. Funk, Regulation of the *scp* genes in the cyanobacterium  
841 *Synechocystis* sp. PCC 6803 — What is new? *Molecules* **20**, 14621–14637  
842 (2015).
- 843 72. J. Komenda, R. Sobotka, Cyanobacterial high-light-inducible proteins--Protectors  
844 of chlorophyll-protein synthesis and assembly. *Biochim. Biophys. Acta* **1857**, 288–  
845 295 (2016).
- 846 73. G. Kufryk, *et al.*, Association of small CAB-like proteins (SCPs) of *Synechocystis*  
847 sp. PCC 6803 with photosystem II. *Photosynth. Res.* **95**, 135–145 (2008).
- 848 74. D. Trautmann, B. Voß, A. Wilde, S. Al-Babili, W. R. Hess, Microevolution in  
849 cyanobacteria: re-sequencing a motile substrain of *Synechocystis* sp. PCC 6803.  
850 *DNA Res.* **19**, 435–448 (2012).
- 851 75. H. M. Beyer, *et al.*, AQUA cloning: A versatile and simple enzyme-free cloning  
852 approach. *PLOS ONE* **10**, e0137652 (2015).

- 853 76. I. Scholz, S. J. Lange, S. Hein, W. R. Hess, R. Backofen, CRISPR-Cas systems  
854 in the cyanobacterium *Synechocystis* sp. PCC6803 exhibit distinct processing  
855 pathways involving at least two Cas6 and a Cmr2 protein. *PLOS ONE* **8**, e56470  
856 (2013).
- 857 77. F. L. Pinto, A. Thapper, W. Sontheim, P. Lindblad, Analysis of current and  
858 alternative phenol based RNA extraction methodologies for cyanobacteria. *BMC*  
859 *Mol. Biol.* **10**, 79–79 (2009).
- 860 78. S. Hein, I. Scholz, B. Voß, W. R. Hess, Adaptation and modification of three  
861 CRISPR loci in two closely related cyanobacteria. *RNA Biol.* **10**, 852–864 (2013).
- 862 79. C. Steglich, *et al.*, The challenge of regulation in a minimal photoautotroph: non-  
863 coding RNAs in *Prochlorococcus*. *PLoS Genet.* **4**, e1000173 (2008).
- 864 80. B. Voß, W. R. Hess, The identification of bacterial non-coding RNAs through  
865 complementary approaches. *RNA Biochem. 2<sup>nd</sup> Ed.*, 787–800 (2014).
- 866 81. M. Li, *et al.*, Detection and characterization of a mycobacterial L-arabinofuranose  
867 ABC transporter identified with a rapid lipoproteomics protocol. *Cell Chem. Biol.*  
868 **26**, 852-862.e6 (2019).
- 869 82. T. Fujisawa, *et al.*, CyanoBase: a large-scale update on its 20th anniversary.  
870 *Nucleic Acids Res.* **45**, D551–D554 (2017).
- 871 83. Y. Perez-Riverol, *et al.*, The PRIDE database and related tools and resources in  
872 2019: improving support for quantification data. *Nucleic Acids Res.* **47**, D442–  
873 D450 (2019).
- 874 84. J. Cox, *et al.*, Accurate proteome-wide label-free quantification by delayed  
875 normalization and maximal peptide ratio wxtraction, termed MaxLFQ. *Mol. Cell.*  
876 *Proteomics* **13**, 2513–2526 (2014).
- 877 85. S. Tyanova, *et al.*, The Perseus computational platform for comprehensive  
878 analysis of (prote)omics data. *Nat. Methods* **13**, 731–740 (2016).
- 879 86. M. P. Malakhov, *et al.*, SUMO fusions and SUMO-specific protease for efficient  
880 expression and purification of proteins. *J. Struct. Funct. Genomics* **5**, 75–86  
881 (2004).
- 882 87. G. Yamanaka, A. N. Glazer, R. C. Williams, Cyanobacterial phycobilisomes.  
883 Characterization of the phycobilisomes of *Synechococcus* sp. 6301. *J. Biol.*  
884 *Chem.* **253**, 8303–8310 (1978).
- 885 88. E. Sendersky, R. Lahmi, J. Shaltiel, A. Perelman, R. Schwarz, NblC, a novel  
886 component required for pigment degradation during starvation in *Synechococcus*  
887 PCC 7942. *Mol. Microbiol.* **58**, 659–668 (2005).
- 888 89. L. G. van Waasbergen, N. Dolganov, A. R. Grossman, *nblS*, a gene involved in  
889 controlling photosynthesis-related gene expression during high light and nutrient  
890 stress in *Synechococcus elongatus* PCC 7942. *J. Bacteriol.* **184**, 2481–2490  
891 (2002).
- 892 90. H. Kato, *et al.*, Interactions between histidine kinase NblS and the response  
893 regulators RpaB and SrrA are involved in the bleaching process of the  
894 cyanobacterium *Synechococcus elongatus* PCC 7942. *Plant Cell Physiol.* **52**,  
895 2115–2122 (2011).
- 896 91. V. G. Tusher, R. Tibshirani, G. Chu, Significance analysis of microarrays applied  
897 to the ionizing radiation response. *Proc. Natl. Acad. Sci.* **98**, 5116–5121 (2001).

898

899

900 **Tables**

901 **Table 1.** Proteins previously identified in different cyanobacteria as involved in the  
902 programmed phycobilisome disassembly and their homologs in *Synechocystis* 6803.  
903 Synonymous names of certain proteins are separated by a slash.

904

| <b>Protein name</b> | <b>Gene ID</b> | <b>Function</b>                          | <b>Reference</b> |
|---------------------|----------------|------------------------------------------|------------------|
| NblA1               | ssl0452        | protease adaptor                         | (32)             |
| NblA2               | ssl0453        | protease adaptor                         | (32)             |
| ClpC                | sll0020        | HSP100 chaperone partner of Clp protease | (70)             |
| NblB1               | sll1663        | bilin lyase homolog                      | (32, 63)         |
| NblB2               | slr1687        | bilin lyase homolog                      | (32, 63)         |
| NblC                | sll1968        | regulator                                | (88)             |
| NblR                | sll0396        | regulator                                | (26)             |
| GntR                | sll1961        | regulator                                | (69)             |
| Hik33/<br>NblS/DspA | sll0698        | sensor kinase                            | (33, 89)         |
| RpaB/Ycf27          | slr0947        | response regulator                       | (90)             |

905

**Table 2.** Microarray expression analysis of wild-type *Synechocystis* 6803 and  $\Delta nbID$ . Total RNA isolated before and 3 h after the induction of nitrogen depletion (-N). TUs (transcriptional units) were used as previously described (46). The values show  $\log_2$  fold changes (FC) in gene expression in the indicated comparisons between  $\Delta nbID$  (KO) and the wild type (WT). *P*-values were calculated using Benjamini-Hochberg adjustment; average expression (AveExpr) defines the mean of all quantile-normalized median probe intensities of one probe set.

| TU     | gene name      | description                                      | KO-WT   | (KO-N)  |         | (WT-N) |         | AveExpr  | P.Value |
|--------|----------------|--------------------------------------------------|---------|---------|---------|--------|---------|----------|---------|
|        |                |                                                  |         | - KO    | -       | - WT   | -       |          |         |
| TU1562 | ssl0452        | phycobilisome degradation protein NbIA1          | 0.7633  | 4.2844  | 1.3378  | 3.7099 | 12.11   | 1.24E-06 |         |
| TU1562 | ssl0453        | phycobilisome degradation protein NbIA2          | 0.5098  | 4.0925  | 1.1365  | 3.4658 | 13.021  | 3.51E-06 |         |
| TU2231 | ssl0707        | nitrogen regulatory protein P-II ( <i>glnB</i> ) | -0.2685 | 2.5413  | 0.2766  | 1.9962 | 14.3284 | 1.43E-06 |         |
| TU1176 | ssl1633        | high light-inducible polypeptide HliC            | 1.1853  | 1.8147  | 1.0736  | 1.9264 | 13.839  | 8.58E-04 |         |
| TU731  | NA             | TU downstream <i>nbID</i>                        | -0.8361 | 1.5190  | -0.4874 | 1.1703 | 9.2525  | 1.47E-06 |         |
| TU1322 | ncl0540        | NsiR4                                            | -0.3998 | 1.8937  | -0.1105 | 1.6044 | 16.5063 | 6.15E-07 |         |
| TU728  | nbID           | nonbleaching protein NbID                        | -1.2176 | 0.1061  | -4.5345 | 3.4230 | 9.0815  | 2.41E-08 |         |
| TU1084 | 5'UTR_TU1084   | 5'UTR <i>ssr2062</i> hypothetical protein        | 0.1869  | -0.5028 | -1.7876 | 1.4717 | 9.2393  | 1.10E-01 |         |
| TU1196 | 5'UTR_TU1196   | 5'UTR <i>slr0888</i> hypothetical protein        | -0.4246 | -0.5397 | -2.1297 | 1.1654 | 9.4856  | 1.39E-04 |         |
| TU1196 | <i>slr0888</i> | hypothetical protein                             | -0.8062 | -0.2794 | -1.5075 | 0.4219 | 10.9447 | 8.03E-03 |         |
| TU895  | <i>ssr2016</i> | <i>pgr5</i>                                      | 0.0862  | 1.2739  | 1.1582  | 0.2019 | 9.3570  | 3.22E-04 |         |
| TU895  | 3'UTR_TU895    | 3'UTR <i>ssr2016 pgr5</i>                        | 0.3005  | 1.7394  | 1.4367  | 0.6032 | 8.8259  | 7.35E-04 |         |
| TU690  | ssl2542        | high light-inducible polypeptide HliA            | 0.9695  | 1.4731  | 1.8528  | 0.5898 | 11.4218 | 4.24E-03 |         |

|               |              |                                                                    |         |         |         |         |         |          |
|---------------|--------------|--------------------------------------------------------------------|---------|---------|---------|---------|---------|----------|
| <b>TU1000</b> | slr1544      | LilA (dicistron with hliB)                                         | 0.9124  | 1.4095  | 1.8281  | 0.4938  | 11.7223 | 6.77E-03 |
| <b>TU1000</b> | ssr2595      | high light-inducible polypeptide HliB                              | 0.9087  | 1.4713  | 1.9308  | 0.4492  | 11.954  | 5.13E-03 |
| <b>TU3571</b> | sll1483      | periplasmic protein hypothetical protein                           | 1.5472  | 0.9114  | 2.0061  | 0.4526  | 11.2792 | 2.03E-03 |
| <b>TU1288</b> | sll2012      | RNA polymerase sigma factor SigD                                   | 0.6005  | 0.6197  | 1.1355  | 0.0847  | 11.4108 | 8.09E-03 |
| <b>TU2046</b> | slr1687      | NblB2                                                              | 0.7740  | -0.1836 | 0.9930  | -0.4026 | 11.2851 | 1.17E-02 |
| <b>TU1715</b> | ncr0710      | Non-coding RNA                                                     | -1.1287 | -1.0351 | -1.5501 | -0.6137 | 11.5519 | 1.36E-04 |
| <b>TU312</b>  | 5'UTR_TU312  | 5'UTR hemF/ho1 (heme oxygenase)                                    | -0.7931 | -1.5947 | -1.0362 | -1.3515 | 12.9456 | 4.74E-06 |
| <b>TU253</b>  | sll1663      | phycocyanin $\alpha$ phycocyanobilin lyase related protein (NblB1) | 0.0380  | -0.7637 | 0.0321  | -0.7577 | 10.4890 | 1.46E-05 |
| <b>NA</b>     | slr0408-as13 | antisense RNA                                                      | -0.4369 | 0.3351  | 1.4070  | -1.5088 | 10.6663 | 1.61E-04 |
| <b>TU627</b>  | 5'UTR_TU627  | 5'UTR gifA                                                         | 1.1144  | -4.9832 | -2.0728 | -1.7961 | 12.1813 | 1.38E-07 |
| <b>TU627</b>  | ssl1911      | glutamine synthetase inactivating factor IF7 (gifA)                | 0.9915  | -4.6785 | -1.3069 | -2.3801 | 13.1670 | 1.23E-06 |
| <b>TU441</b>  | 5'UTR_TU441  | 5'UTR gifB                                                         | 1.1982  | -4.5710 | -1.5565 | -1.8163 | 13.0469 | 6.61E-06 |
| <b>TU441</b>  | sll1515      | glutamine synthetase inactivating factor IF17 (gifB)               | 1.3079  | -4.6806 | -0.9870 | -2.3857 | 12.8850 | 4.75E-05 |

**Table 3.** Most abundant proteins identified by MS analysis for FLAG affinity-pull down samples containing tagged NbID versus knockout samples and their calculated LFQ intensities (84) using MaxQuant. Acronyms: aa, amino acids; MW, molecular weight; PS, photosynthesis; LFQ, label-free quantification. The experiment was performed in biological triplicates, indicated by the numbers 1 to 3.

| Majority protein IDs                                    | GO term                             | MW [kDa] | aa  | $\Delta$ nbID 1 | $\Delta$ nbID 2 | $\Delta$ nbID 3 | nbID_3xFLAG 1 | nbID_3xFLAG 2 | nbID_3xFLAG 3 |
|---------------------------------------------------------|-------------------------------------|----------|-----|-----------------|-----------------|-----------------|---------------|---------------|---------------|
| sll1577 phycocyanin $\beta$ subunit                     | PS antenna                          | 18.1     | 172 | 4.3E+08         | 3.6E+08         | 2.8E+08         | 1.0E+10       | 1.2E+10       | 7.2E+09       |
| NbID_3xFLAG fusion protein                              | n/a                                 | 99.3     | 89  | 0               | 0               | 0               | 5.2E+09       | 7.4E+09       | 8.8E+09       |
| sll1578 phycocyanin $\alpha$ subunit                    | PS antenna                          | 17.6     | 162 | 5.1E+08         | 2.7E+08         | 2.9E+08         | 4.2E+09       | 5.0E+09       | 5.5E+09       |
| slr0335 phycobilisome core-membrane linker ApcE         | PS antenna                          | 100.3    | 896 | 2.3E+09         | 4.2E+09         | 5.5E+08         | 2.0E+09       | 1.7E+07       | 1.3E+07       |
| slr1140 DegT/DnrJ/EryC1/StrS-family protein             | polysaccharide biosynthetic process | 41.6     | 378 | 1.3E+09         | 9.8E+08         | 2.2E+09         | 5.3E+08       | 9.1E+08       | 6.7E+08       |
| sll1580 phycobilisome rod linker polypeptide CpcC1      | PS antenna                          | 32.5     | 291 | 1.1E+09         | 3.0E+08         | 3.2E+08         | 8.9E+08       | 1.1E+08       | 3.1E+08       |
| slr2067 allophycocyanin $\alpha$ subunit                | PS antenna                          | 17.4     | 161 | 3.4E+08         | 1.4E+08         | 1.6E+08         | 3.5E+08       | 8.9E+07       | 8.2E+07       |
| ssr0482 30S ribosomal protein S16                       | ribosome                            | 95.6     | 82  | 4.0E+07         | 1.7E+08         | 3.0E+08         | 8.7E+07       | 1.1E+08       | 2.7E+08       |
| sll1099 elongation factor Tu                            | translation                         | 43.7     | 399 | 4.3E+08         | 6.5E+07         | 1.2E+07         | 2.3E+08       | 4.0E+07       | 1.3E+07       |
| sll1744 50S ribosomal protein L1                        | ribosome                            | 25.9     | 238 | 2.6E+07         | 1.7E+07         | 1.5E+08         | 1.8E+08       | 3.5E+08       | 2.2E+08       |
| slr2051 phycobilisome rod-core linker polypeptide CpcG1 | PS antenna                          | 28.9     | 249 | 2.4E+08         | 6.5E+07         | 9.3E+07         | 1.7E+08       | 1.1E+07       | 7.5E+07       |
| sll1579 phycobilisome rod linker polypeptide CpcC2      | PS antenna                          | 30.8     | 273 | 2.6E+08         | 5.7E+07         | 4.6E+07         | 1.3E+08       | 1.6E+07       | 5.6E+07       |
| slr2018 unknown protein                                 | ?                                   | 84.9     | 799 | 1.6E+08         | 8.3E+07         | 2.1E+08         | 1.2E+07       | 1.0E+08       | 0             |
| slr1986 allophycocyanin $\beta$ subunit                 | PS antenna                          | 17.2     | 161 | 1.6E+08         | 0               | 3.9E+07         | 1.1E+08       | 2.3E+07       | 9.6E+07       |

## Figures

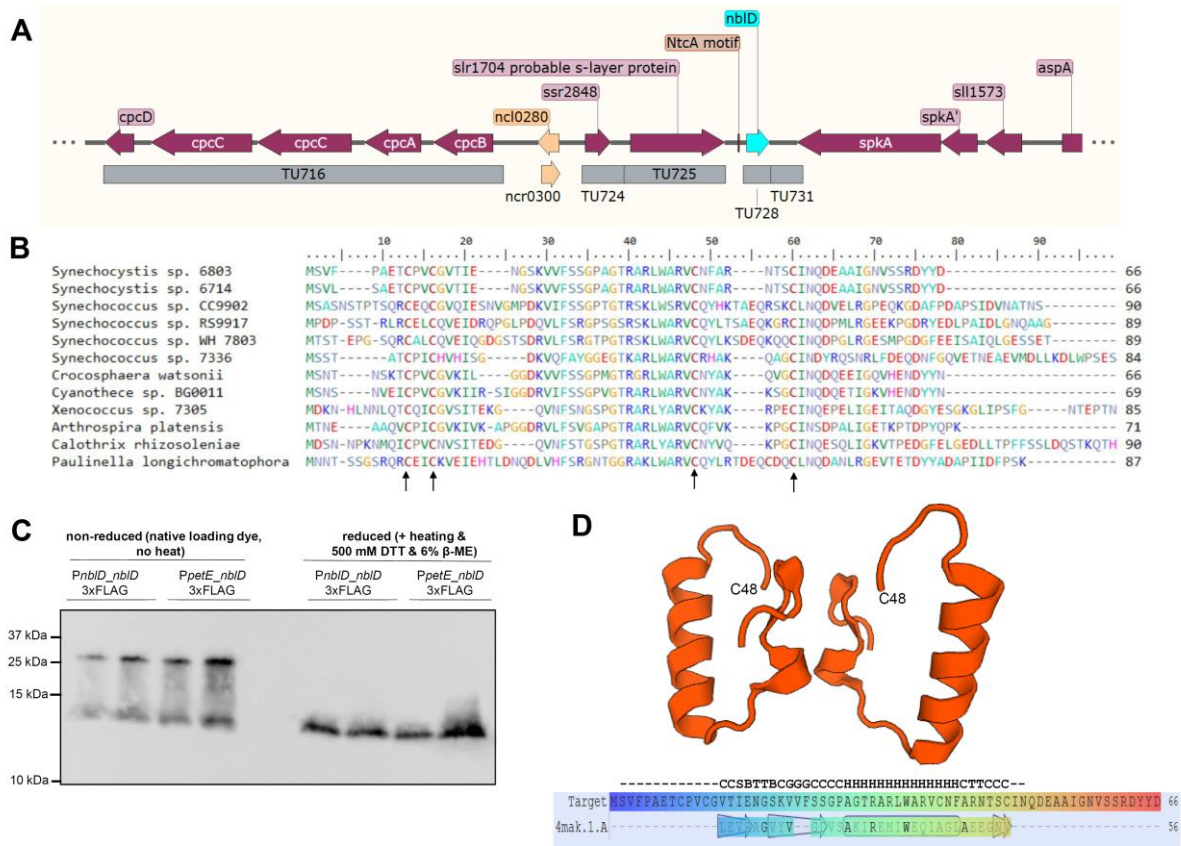

**Fig. 1. A.** Genomic location of *nbID* in *Synechocystis* 6803. Transcriptional units (TUs) are indicated according to the previous annotation of the transcriptome and genome-wide mapping of transcriptional start sites (46). **B.** Alignment of NbID homologs from cyanobacteria belonging to four morphological subsections (51); conserved cysteine residues are marked by an arrow. **C.** Western blotting using anti-FLAG antiserum against tagged NbID and reducing and nonreducing conditions for SDS-PAGE. The expression of *nbID* was induced by nitrogen removal (native  $P_{nbID}$  promoter) or the addition of 2  $\mu\text{M}$   $\text{Cu}^{2+}$  ions ( $P_{petE}$  promoter). All samples were loaded in biological duplicates. **D.** Predicted structure model for NbID generated by SWISS-MODEL (59) as a homodimer using the crystal structure of the *E. coli* Cas2 CRISPR protein 4mak.1 as template. The structure is modelled from position 14A to C48, the position of the latter in the two molecules is given for orientation. Lower part: Alignment of NbID (Target) to template, the sequence is rainbow colored from blue (N terminus) to red (C terminus). The symbols indicate predicted secondary structure (G = 3-turn helix, H =  $\alpha$  helix, T = hydrogen bonded turn, B = residue in isolated  $\beta$ -bridge, S = bend, C = coil).



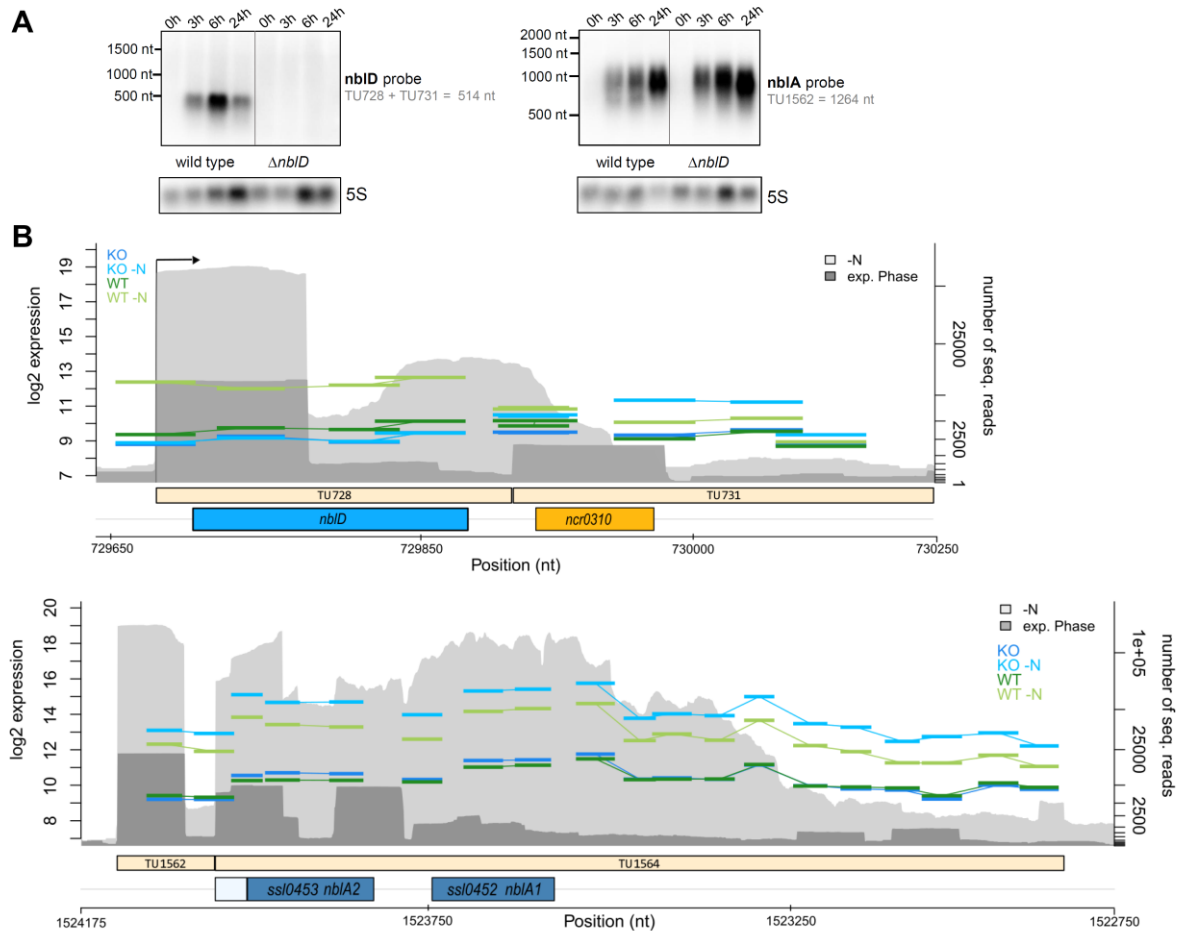

**Fig. 2.** Changes in the abundance of mRNAs in response to an altered nitrogen supply in WT and  $\Delta nbID$ . **A.** Northern blot probing *nbID* and *nbIA* in the wild type and  $\Delta nbID$  mutant at 0, 3, 6 and 24 h after the start of nitrogen depletion. **B.** Microarray data visualized for the transcriptional units (TUs) for *nbIA* (TU1564) and *nbID* (TU728 + TU731). The log<sub>2</sub> expression values of probes were compared for samples from wild-type (WT) and  $\Delta nbID$  (KO) cultures grown with nitrogen (dark green and dark blue, respectively) and 3 h after the induction of nitrogen depletion (-N, lighter green and lighter blue) at the left scale. The number of sequenced reads (46) for the exponential phase (exp. phase, dark gray) and nitrogen starvation for 12 h (-N, light gray) were included in the background (right scale).

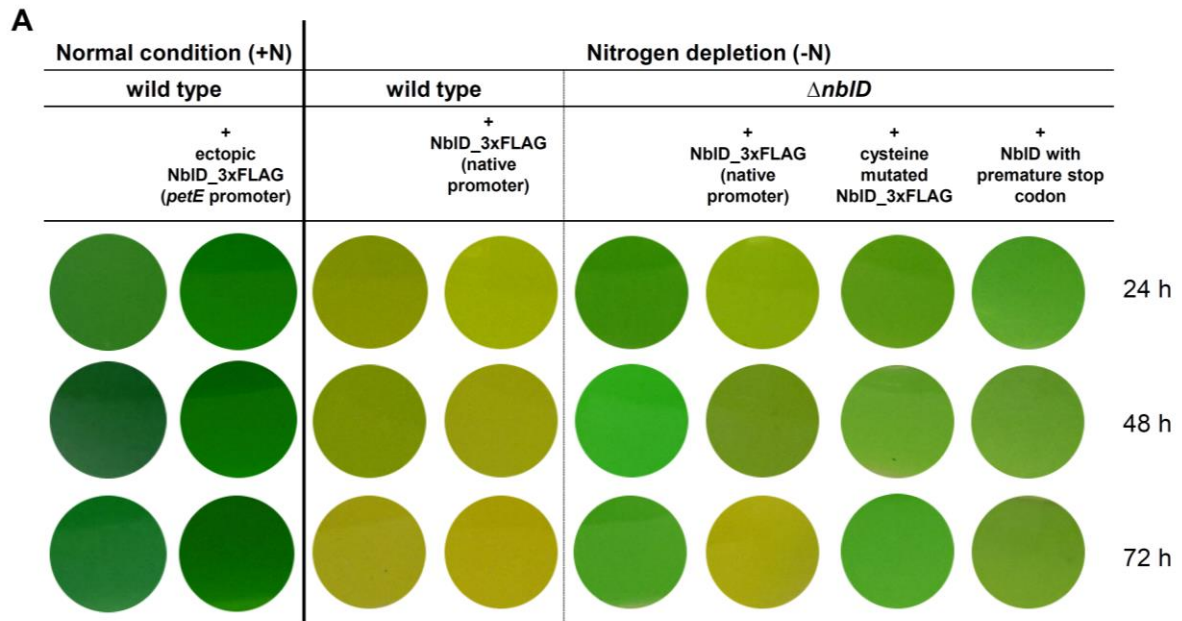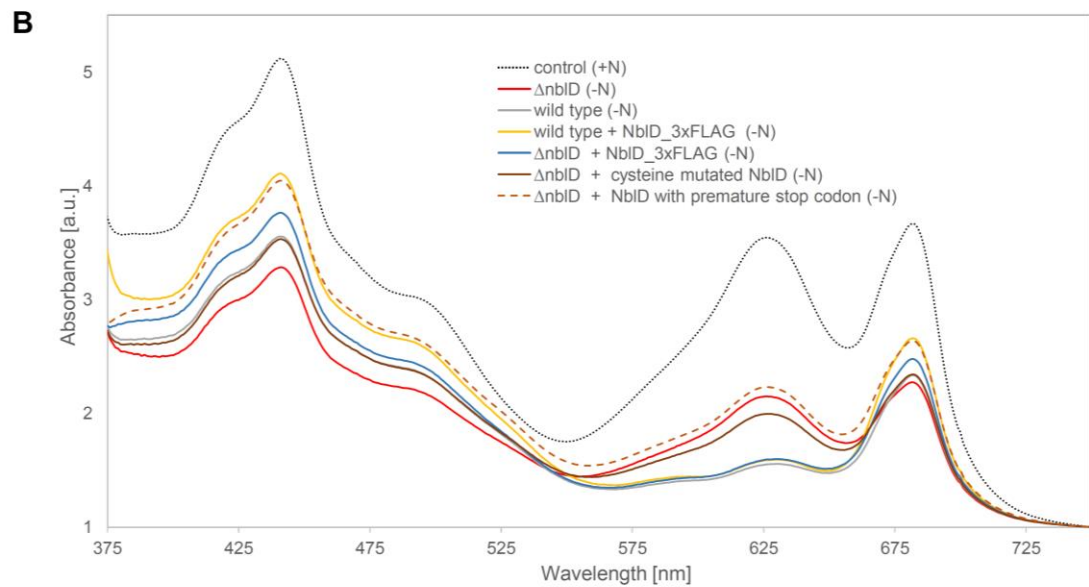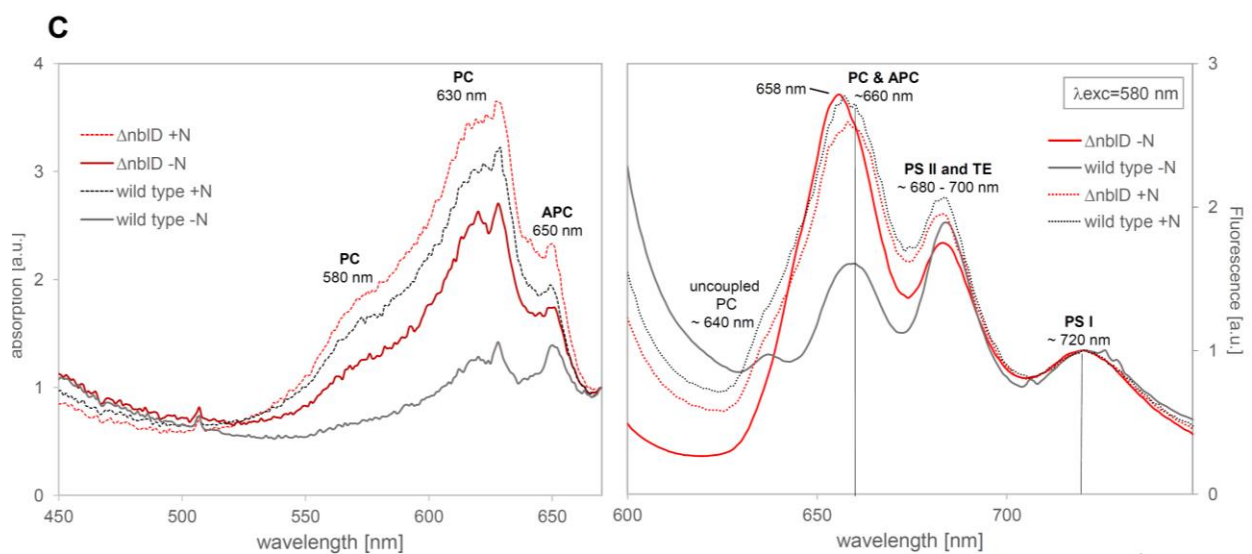

**Fig. 3.** Phenotypical differences between *nbID* mutants and the wild type in nitrogen-replete and -deplete media. **A.** Cultures. **B.** Room temperature absorption spectra for *nbID* mutants normalized to OD<sub>750</sub>. **C.** Low-temperature absorption spectra at 77K for  $\Delta nbID$  and the wild type with and without nitrogen. The spectra were normalized to the minimum at 670 nm. **D.** Emission spectra at 77K and a constant 580 nm excitation for the  $\Delta nbID$  and wild-type strains with and without nitrogen. The spectra were normalized to the photosystem I peak at 720 nm. Acronyms in panels C and D: PC, phycocyanin; APC, allophycocyanin; PSI and PSII, photosystem I and II; TE, terminal emitter.

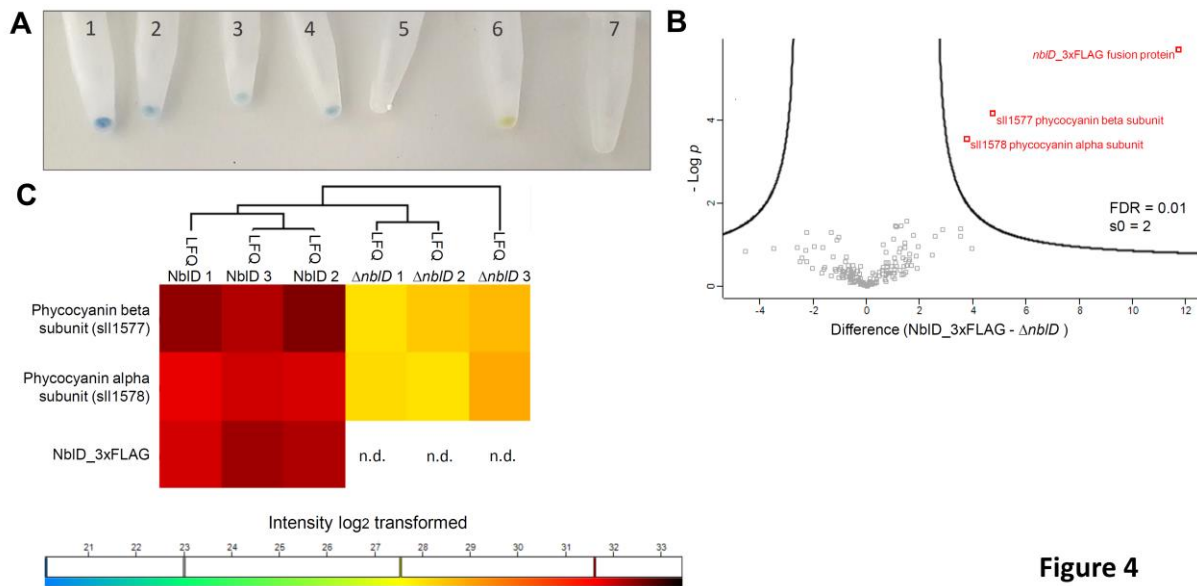

**Figure 4**

**Fig. 4.** Enrichment of phycobilisome proteins in NbID pull-down experiments. **A.** The collected samples with FLAG-tagged proteins in affinity gels after the final wash step and before the elution were initially incubated as follows: 1–4: lysates containing nbID\_3xFLAG; 5: incubated with  $\Delta nbID$  lysate; 6: lysate containing norf1\_3xFLAG (49); 7: lysate containing sfGFP\_3xFLAG. **B.** Volcano plot of enriched proteins using a false discovery rate (FDR) of 0.01 and  $s_0$  (coefficient for variance minimization, see (91)) of 2. **C.** Hierarchical clustering of the most abundant proteins detected in the MS indicating higher log<sub>2</sub> transformed LFQ (label-free quantification) intensities for the phycocyanin subunits in the NbID\_3xFLAG containing samples. NbID was not detected (n.d.) in the knockout samples of  $\Delta nbID$ .

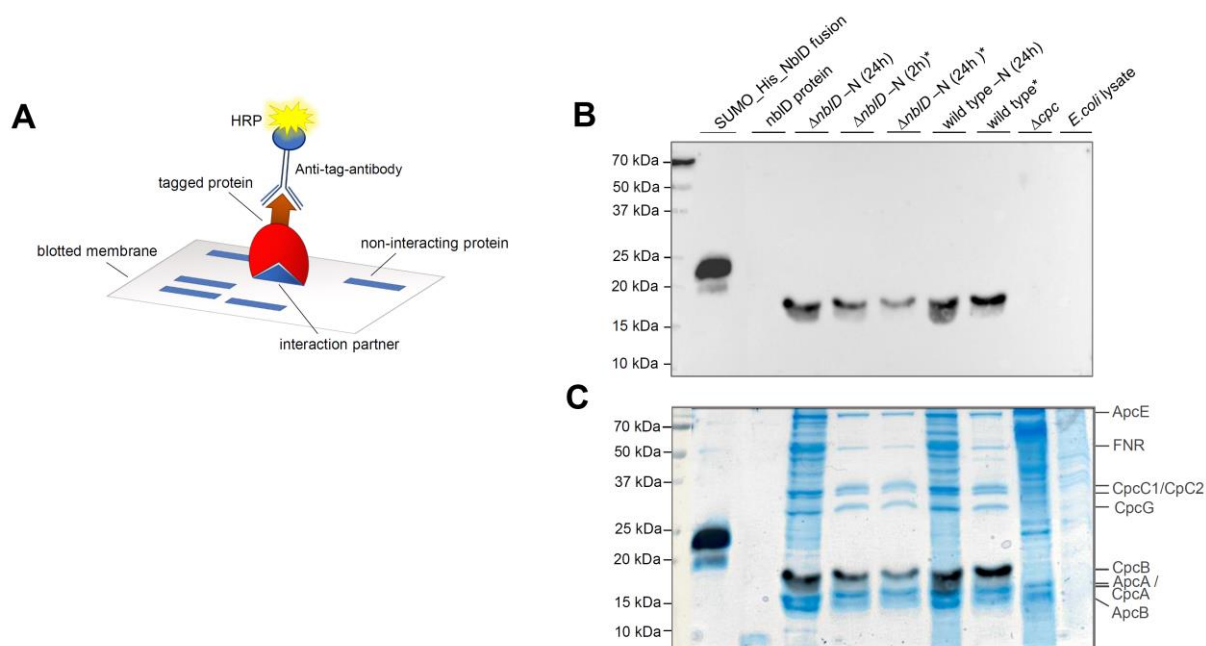

**Fig. 5.** Far western blot analysis. **A.** General principle for the detection of protein-protein interactions by far western blotting using a tagged protein to probe potential interaction partners blotted on a membrane. A secondary antibody, coupled to horseradish-peroxidase (HRP), targets the protein tag. **B.** Western blot signal. **C.** Signal merged to the stained gel to visualize that the signal overlaps with the stained phycocyanin beta subunit. Samples marked with asterisk (\*) are isolated phycobilisome proteins.

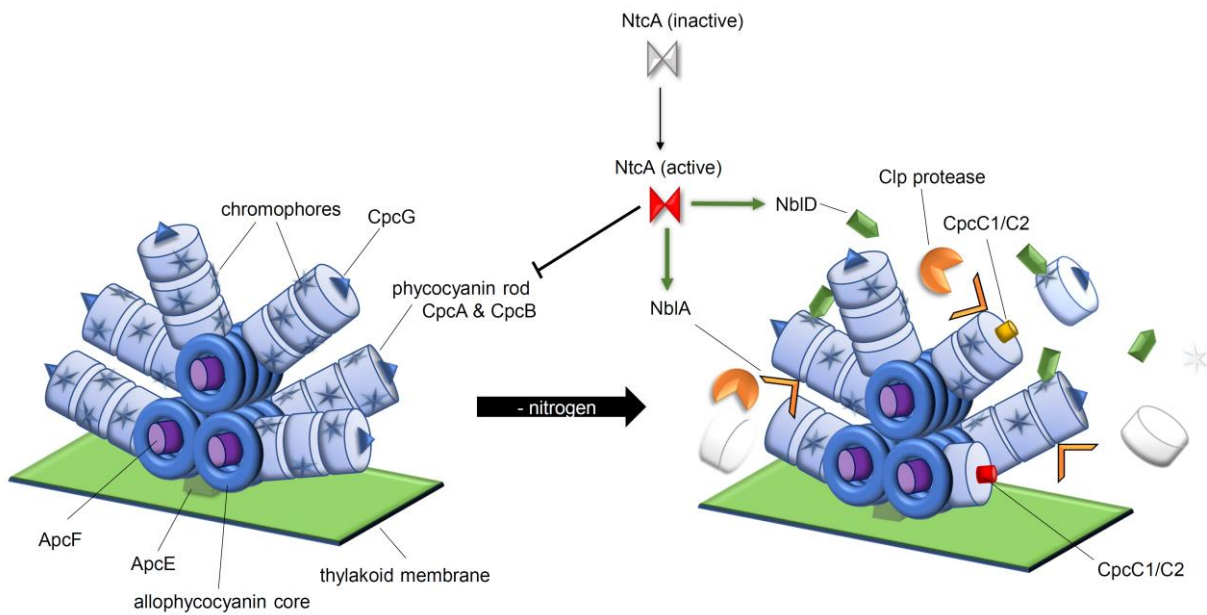

**Fig. 6.** Proposed model for the integration of NbID into the genetic program to respond to nitrogen starvation and its role in phycobilisome degradation in the early phase of nitrogen depletion. NtcA, the major transcriptional regulator of the response to low nitrogen activates transcription of the *nbID* and *nblA* genes (green arrows) while it represses the transcription of the *cpcBAC2C1D* operon (17) encoding the phycocyanin rod and linker proteins. While NblA targets CpcB as protease adaptor recruiting Clp protease, our data suggest that NbID interacts with the chromophorylated phycocyanin and assists the removal of tetrapyrrole chromophores.
